# Supplementary material
Source: publisher figshare collection journal article supplement (https://gsajournals.figshare.com/ndownloader/files/14706437)
Supplement: Supplementary file 1 [file 14706437]

## Sheet: Data S1 DGRP Line Totals
Line	m♂	yw♂	Ryw♂	Ry♂	WT♂	y♂	R♀	Rm♀	Ry♀	WT♀	m♀	y♀	Total	Drive Conversion Efficiency	Embryo r2 Formation Rate (in flies with the drive)	Embryo r2 MosaicRate (in flies with the drive)	Embryo adjusted with 50% mosaic	Mosaic Difference	Male WT Rate
21	2	0	150	69	4	60	5	102	68	6	58	11	533	0.457692	0.388571	0.582857	0.68	0.136868	0.0296296
26	0	0	185	79	11	59	21	102	113	14	35	26	645	0.52381	0.478814	0.432203	0.694915	0.0270724	0.0738255
38	0	0	191	73	13	87	11	100	114	10	46	20	665	0.455951	0.506667	0.444444	0.728889	0.0549388	0.0751445
40	0	1	153	61	10	42	50	129	25	29	30	10	540	0.51503	0.122549	0.632353	0.438725	0.152781	0.0884956
45	0	0	173	86	17	38	49	160	39	16	55	9	642	0.557377	0.157258	0.645161	0.479839	0.162613	0.120567
49	1	0	219	92	9	52	3	63	179	13	24	47	701	0.541601	0.730612	0.257143	0.859184	0.0449498	0.0584416
57	3	0	274	105	32	72	111	142	87	73	45	13	954	0.468156	0.255882	0.417647	0.464706	-0.0613073	0.150943
59	0	1	320	175	25	85	117	164	134	58	39	18	1136	0.590909	0.322892	0.395181	0.520482	-0.0711594	0.0877193
69	1	1	286	146	27	110	31	192	162	35	69	27	1086	0.50369	0.420779	0.498701	0.67013	0.0655817	0.0950704
80	1	2	294	179	44	88	71	263	44	73	90	15	1163	0.472881	0.116402	0.695767	0.464286	0.216952	0.141026
83	0	1	267	118	27	74	61	197	102	33	42	31	953	0.542035	0.283333	0.547222	0.556944	0.0724401	0.123288
85	0	1	161	95	6	45	12	95	50	5	20	8	498	0.651452	0.318471	0.605096	0.621019	0.13767	0.0410959
88	2	0	160	95	7	47	9	132	91	7	38	11	597	0.620339	0.392241	0.568966	0.676724	0.124347	0.0463576
91	1	0	294	128	71	94	118	245	51	77	60	15	1153	0.448873	0.123188	0.591787	0.419082	0.112141	0.241497
101	0	0	69	62	7	24	15	127	30	10	36	2	382	0.610837	0.174419	0.738372	0.543605	0.255168	0.0752688
105	1	0	256	123	14	115	31	114	163	22	71	60	969	0.414685	0.529221	0.37013	0.714286	-0.00568108	0.055336
109	0	1	218	83	17	68	91	138	57	27	23	7	730	0.581738	0.199301	0.482517	0.440559	-0.000679132	0.10119
129	1	0	162	73	12	45	69	77	63	39	29	10	579	0.504554	0.301435	0.368421	0.485646	-0.102854	0.0916031
136	0	0	214	125	8	108	3	130	116	10	57	15	786	0.512915	0.465863	0.522088	0.726908	0.110177	0.033195
138	0	0	186	106	6	90	30	60	148	22	24	22	694	0.538028	0.621849	0.252101	0.747899	-0.057689	0.029703
149	0	0	151	78	5	34	16	74	75	11	23	23	490	0.578947	0.454545	0.448485	0.678788	0.0308989	0.042735
153	0	0	213	91	20	96	23	171	75	46	89	30	854	0.337264	0.27881	0.635688	0.596654	0.160123	0.0966184
161	0	0	383	162	28	155	69	236	139	77	97	37	1383	0.414126	0.313063	0.531532	0.578829	0.0628261	0.0811594
176	0	0	161	57	15	73	8	104	105	10	70	25	628	0.369281	0.483871	0.479263	0.723502	0.0768632	0.103448
177	1	2	195	98	5	38	6	49	173	4	15	17	602	0.708029	0.758772	0.214912	0.866228	0.0315215	0.0352113
181	1	0	181	81	10	94	24	111	77	34	69	29	710	0.337989	0.363208	0.523585	0.625	0.0687997	0.0537634
208	0	0	255	139	25	105	45	218	71	47	75	16	996	0.469307	0.212575	0.652695	0.538922	0.169966	0.0929368
223	0	0	256	110	11	77	24	166	198	25	37	33	937	0.583618	0.510309	0.427835	0.724227	0.0404781	0.0555556
228	0	0	311	126	30	117	74	173	123	65	46	22	1087	0.466158	0.332432	0.467568	0.566216	0.00369282	0.10989
235	0	0	281	125	13	79	30	156	142	22	43	24	915	0.574618	0.432927	0.47561	0.670732	0.0478378	0.0599078
237	0	2	383	172	22	117	23	116	285	28	54	108	1310	0.467638	0.67217	0.273585	0.808962	0.00625433	0.0707395
239	0	0	211	115	8	49	64	145	93	34	33	10	762	0.629322	0.307947	0.480132	0.548013	0.0102659	0.0465116
272	0	2	408	207	13	131	55	210	322	30	61	74	1513	0.574966	0.548552	0.357751	0.727428	-0.00557987	0.037037
280	0	0	813	406	61	386	214	384	516	143	143	123	3189	0.469805	0.463196	0.344704	0.635548	-0.0685665	0.0715123
287	1	0	235	153	6	85	19	149	175	20	61	39	942	0.555089	0.510204	0.434402	0.727405	0.046983	0.0244898
304	5	2	166	98	10	47	90	149	44	32	26	6	670	0.622189	0.155477	0.526502	0.418728	0.0440522	0.0625
309	6	0	218	87	18	71	24	168	70	25	80	14	775	0.425503	0.267176	0.641221	0.587786	0.163816	0.0989011
310	0	0	172	78	7	61	10	68	138	8	48	30	620	0.481481	0.638889	0.314815	0.796296	0.0188831	0.0479452
317	0	0	268	112	17	71	103	98	68	68	49	25	879	0.432799	0.252788	0.364312	0.434944	-0.115026	0.085
318	0	0	261	118	11	141	7	103	184	10	78	97	1010	0.338567	0.62585	0.35034	0.80102	0.0437568	0.0407407
319	0	0	412	247	37	112	109	217	247	60	44	26	1511	0.626756	0.431065	0.378709	0.620419	-0.0499008	0.0934343
321	1	0	224	144	4	73	9	132	150	24	59	29	848	0.551358	0.515464	0.453608	0.742268	0.0693333	0.018018
336	0	0	370	223	22	132	32	142	297	15	78	51	1362	0.564646	0.630573	0.301486	0.781316	-0.00127483	0.0583554
338	0	3	463	198	18	130	89	234	147	40	57	32	1411	0.570875	0.312766	0.497872	0.561702	0.0290982	0.0520231
350	1	1	217	79	21	134	116	90	42	81	36	11	828	0.328605	0.169355	0.362903	0.350806	-0.120164	0.0893617
352	0	0	380	173	23	120	19	136	336	19	52	62	1320	0.56051	0.684318	0.276986	0.822811	0.0206007	0.0727848
356	2	0	240	127	7	93	16	171	148	12	73	18	905	0.542411	0.441791	0.510448	0.697015	0.0867487	0.0305677
357	0	0	234	99	23	67	39	202	64	21	65	13	827	0.516624	0.209836	0.662295	0.540984	0.179444	0.121693
358	0	1	273	96	25	80	54	189	61	50	64	12	905	0.444712	0.200658	0.621711	0.511513	0.138547	0.124378
360	2	0	265	136	14	95	5	175	172	13	56	43	974	0.534447	0.488636	0.497159	0.737216	0.0973763	0.0566802
361	1	1	122	137	11	57	16	78	171	13	32	26	664	0.625668	0.645283	0.29434	0.792453	0.00374537	0.0533981
362	6	0	273	138	13	95	64	178	42	41	43	6	893	0.535308	0.147887	0.626761	0.461268	0.144798	0.0515873
365	0	0	49	25	0	12	4	30	34	7	13	2	176	0.585366	0.5	0.441176	0.720588	0.0478015	0
367	1	0	215	71	15	48	53	165	40	33	34	7	681	0.541528	0.155039	0.639535	0.474806	0.157111	0.111111
370	0	0	198	85	7	88	4	145	102	11	61	17	718	0.474286	0.406375	0.577689	0.695219	0.138579	0.0388889
373	4	0	210	118	8	68	38	103	80	32	57	4	718	0.512676	0.361991	0.466063	0.595023	0.0108859	0.040404
374	2	1	156	98	11	37	8	103	95	15	46	17	587	0.558621	0.461165	0.5	0.711165	0.0857043	0.0743243
377	1		128	63	6	54	12	112	63	14	28	15	495	0.520325	0.336898	0.59893	0.636364	0.136267	0.0483871
380	0	0	202	125	17	83	88	159	55	56	19	16	820	0.546856	0.182119	0.52649	0.445364	0.0431668	0.0755556
381	0	0	181	97	6	38	27	88	150	14	15	12	628	0.710884	0.566038	0.332075	0.732075	-0.0193772	0.0425532
383	0	0	159	74	7	73	18	101	135	11	39	23	640	0.51811	0.531496	0.397638	0.730315	0.0232602	0.0454545
385	0	0	238	77	9	81	9	60	213	0	30	37	754	0.540264	0.755319	0.212766	0.861702	0.0257654	0.0538922
386	0	1	173	94	9	68	40	90	115	12	15	16	633	0.619048	0.469388	0.367347	0.653061	-0.0427498	0.0526316
387	0	1	432	214	13	176	96	232	204	50	73	49	1540	0.521854	0.383459	0.43609	0.601504	-0.0117667	0.0322581
391	0	0	243	124	3	52	23	65	246	6	21	28	811	0.705489	0.736527	0.194611	0.833832	-0.0116532	0.0167598
392	0	0	340	122	7	133	22	74	371	13	33	88	1203	0.512889	0.794433	0.158458	0.873662	0.0136277	0.0267176
393	1	0	508	259	60	120	274	309	188	124	41	9	1892	0.610959	0.243839	0.400778	0.444228	-0.0795707	0.136364
398	0	1	408	188	25	163	132	146	219	86	93	103	1564	0.386022	0.440644	0.293763	0.587525	-0.130472	0.0664894
399	0	0	240	57	8	104	23	132	107	14	49	11	745	0.448071	0.408397	0.503817	0.660305	0.0655246	0.0473373
405	0	0	193	86	12	70	111	99	71	53	35	6	736	0.504923	0.252669	0.352313	0.428826	-0.127039	0.0714286
406	0	0	219	138	6	56	31	82	173	16	18	27	766	0.670683	0.604895	0.286713	0.748252	-0.0363362	0.03
409	0	0	243	78	3	113	23	113	164	8	34	53	832	0.461047	0.546667	0.376667	0.735	0.0120883	0.0154639
427	5	0	206	106	12	82	155	112	21	93	30	4	821	0.452121	0.0729167	0.388889	0.267361	-0.0825903	0.0585366
437	2	0	266	135	21	85	62	240	88	141	59	8	1105	0.416974	0.225641	0.615385	0.533333	0.133433	0.0864198
440	0	0	156	81	3	78	187	44	36	84	10	6	685	0.476122	0.134831	0.164794	0.217228	-0.316084	0.0185185
441	0	0	220	93	13	83	73	130	66	30	33	7	748	0.53696	0.245353	0.483271	0.486989	0.00308315	0.0687831
443	1	0	257	114	16	66	39	66	129	29	24	28	768	0.537377	0.551282	0.282051	0.692308	-0.0794622	0.0812183
461	0	0	231	79	11	90	35	98	138	43	39	8	772	0.47018	0.509225	0.361624	0.690037	-0.0263754	0.0611111
486	0	0	224	93	7	92	31	154	177	7	15	9	809	0.66538	0.48895	0.425414	0.701657	0.0258054	0.0364583
491	1	0	410	188	20	164	84	236	199	43	71	17	1432	0.547278	0.38343	0.454721	0.61079	0.00685327	0.0536193
492	0	0	196	90	12	46	82	152	25	72	35	4	714	0.492492	0.0965251	0.586873	0.389961	0.110981	0.0810811
502	1	0	177	104	24	54	92	69	63	53	38	24	698	0.449645	0.28125	0.308036	0.435268	-0.167111	0.131148
508	0	0	304	151	14	123	53	157	171	40	109	33	1155	0.43986	0.448819	0.412073	0.654856	-0.00829404	0.0486111
513	0	0	196	99	6	66	12	109	155	9	33	39	724	0.562232	0.561594	0.394928	0.759058	0.0404031	0.0350877
514	0	2	242	56	60	58	207	27	35	130	11	7	835	0.304575	0.130112	0.100372	0.180297	-0.380037	0.344828
535	1	0	335	174	69	104	274	105	85	138	27	27	1338	0.45858	0.18319	0.226293	0.296336	-0.257038	0.198276
554	0	0	201	123	7	71	24	105	192	7	43	16	789	0.634981	0.598131	0.327103	0.761682	-0.00109007	0.0348259
555	0	0	207	120	5	53	68	115	137	23	61	16	805	0.592784	0.428125	0.359375	0.607812	-0.0705432	0.0280899
563	0	1	176	69	8	69	26	81	121	14	17	7	589	0.587814	0.530702	0.355263	0.708333	-0.0196159	0.0547945
584	0	1	46	28	2	15	9	24	42	2	13	9	191	0.566138	0.56	0.32	0.72	-0.0356176	0.0444444
589	0	0	215	113	6	75	11	59	151	18	33	78	759	0.430894	0.683258	0.266968	0.816742	0.00961759	0.0309278
595	0	0	192	100	5	68	171	61	61	67	17	8	750	0.548564	0.208191	0.208191	0.312287	-0.274728	0.0289017
639	0	1	264	104	4	56	39	112	108	19	28	20	755	0.611621	0.416988	0.432432	0.633205	-0.00230059	0.0243902
642	0	1	136	67	7	32	57	66	53	30	20	9	478	0.561521	0.301136	0.375	0.488636	-0.0963378	0.0660377
703	0	0	236	126	16	66	66	53	62	92	40	58	815	0.308767	0.342541	0.292818	0.48895	-0.168263	0.0769231
705	0	0	374	166	18	138	51	207	290	41	85	84	1454	0.477889	0.529197	0.377737	0.718066	0.0019114	0.0559006
707	0	0	212	90	4	70	79	76	123	44	17	14	729	0.562408	0.442446	0.273381	0.579137	-0.150011	0.0243902
712	0	0	56	18	0	30	16	34	89	7	16	19	285	0.480144	0.640288	0.244604	0.76259	-0.0501661	0
714	0	0	55	22	2	13	5	28	46	3	8	8	190	0.604651	0.582278	0.35443	0.759494	0.0145124	0.0540541
716	0	2	204	89	5	57	11	80	100	11	35	19	613	0.544803	0.52356	0.418848	0.732984	0.0395125	0.0331126
727	0	0	195	96	11	64	50	88	77	35	35	9	660	0.515723	0.35814	0.409302	0.562791	-0.0470991	0.0643275
732	0	0	198	88	18	38	48	108	86	41	31	23	679	0.5168	0.355372	0.446281	0.578512	-0.0109832	0.125
737	0	0	360	202	21	131	44	106	203	43	89	154	1353	0.349666	0.575071	0.300283	0.725212	-0.0448135	0.059322
738	0	0	214	98	18	93	44	135	131	37	47	24	841	0.476077	0.422581	0.435484	0.640323	0.00314021	0.0861244
748	0	0	343	184	21	117	182	217	116	117	47	31	1375	0.508124	0.225243	0.421359	0.435922	-0.0606209	0.0652174
750	0	0	198	65	5	53	34	138	106	23	26	21	669	0.569024	0.381295	0.496403	0.629496	0.0477699	0.0406504
761	0	0	168	76	14	36	23	80	100	21	28	24	570	0.534091	0.492611	0.394089	0.689655	-0.00347989	0.111111
771	0	0	173	80	10	62	47	75	60	34	24	21	586	0.465487	0.32967	0.412088	0.535714	-0.0525177	0.0657895
774	1	0	217	97	5	93	52	140	142	36	39	33	854	0.503597	0.42515	0.419162	0.634731	-0.0120651	0.0255102
776	0	0	126	82	13	66	32	72	131	22	29	24	597	0.512658	0.557447	0.306383	0.710638	-0.0509757	0.0807453
786	0	0	192	60	7	51	21	57	88	20	21	22	539	0.47957	0.53012	0.343373	0.701807	-0.0318718	0.059322
787	0	0	125	47	3	38	46	30	63	12	6	9	379	0.602339	0.453237	0.215827	0.561151	-0.202399	0.0340909
790	0	0	220	115	5	94	19	73	141	25	35	26	753	0.504685	0.60515	0.313305	0.761803	-0.00954917	0.0233645
796	0	0	211	79	2	68	9	115	113	12	61	33	703	0.450858	0.476793	0.485232	0.719409	0.079023	0.0134228
802	0	0	132	62	1	31	10	42	103	4	8	14	407	0.685637	0.664516	0.270968	0.8	-0.00312006	0.0106383
804	0	0	168	60	4	14	38	48	91	15	11	8	458	0.716621	0.514124	0.271186	0.649718	-0.113894	0.0512821
808	0	0	246	89	17	72	80	124	40	84	86	8	846	0.313625	0.163934	0.508197	0.418033	0.0253288	0.0955056
810	0	0	209	133	18	43	70	167	68	45	25	1	779	0.65445	0.222951	0.547541	0.496721	0.0654037	0.0927835
812	0	0	105	55	5	27	13	35	67	6	13	4	330	0.647436	0.582609	0.304348	0.734783	-0.0353306	0.0574713
818	0	0	157	47	8	25	49	71	91	20	10	2	480	0.677419	0.43128	0.336493	0.599526	-0.0920201	0.1
819	0	0	187	73	5	47	34	73	90	26	38	35	608	0.446886	0.456853	0.370558	0.642132	-0.0458898	0.04
820	0	0	232	92	8	54	82	107	63	64	29	23	754	0.473373	0.25	0.424603	0.462302	-0.0550656	0.0519481
821	0	0	238	119	18	100	1	104	200	28	43	77	928	0.426106	0.655738	0.340984	0.82623	0.0592778	0.0759494
822	0	0	126	51	2	20	24	69	48	26	30	18	414	0.468144	0.340426	0.489362	0.585106	0.0276809	0.0273973
832	0	0	154	83	13	38	72	125	86	38	28	12	649	0.589825	0.303887	0.441696	0.524735	-0.0290577	0.0970149
843	0	0	209	72	20	70	96	80	81	33	39	21	721	0.456973	0.315175	0.311284	0.470817	-0.156928	0.123457
849	1	1	198	77	14	72	107	63	51	61	29	15	688	0.412844	0.230769	0.285068	0.373303	-0.196494	0.0853659
850	0	0	267	104	13	90	37	49	108	48	61	71	848	0.281726	0.556701	0.252577	0.68299	-0.105288	0.0628019
853	0	1	271	111	17	79	157	74	56	100	30	19	915	0.423529	0.195122	0.25784	0.324042	-0.225437	0.0821256
855	0	1	247	77	10	54	7	68	153	10	36	74	737	0.415873	0.671053	0.298246	0.820175	0.029922	0.070922
859	1	1	281	137	18	65	31	88	148	24	33	37	863	0.556663	0.554307	0.329588	0.719101	-0.0298954	0.081448
861	0	0	202	118	4	91	39	28	259	25	10	30	806	0.608323	0.794479	0.0858896	0.837423	-0.0588897	0.0187793
892	0	0	361	169	58	130	255	130	52	134	59	5	1353	0.427724	0.118993	0.297483	0.267735	-0.18166	0.162465
894	0	0	197	138	28	21	44	79	105	56	21	18	707	0.586801	0.460526	0.346491	0.633772	-0.0681254	0.149733
897	1	0	490	220	58	184	220	136	80	231	64	28	1711	0.32819	0.183486	0.311927	0.33945	-0.171406	0.12527
900	0	0	230	108	20	71	181	102	22	73	26	3	836	0.520497	0.0721311	0.334426	0.239344	-0.136889	0.100503
907	0	0	258	129	13	61	44	145	138	33	33	23	877	0.603406	0.422018	0.443425	0.643731	0.0108386	0.0640394
913	0	0	183	113	11	60	52	51	126	35	34	49	714	0.471329	0.550218	0.222707	0.661572	-0.139516	0.0597826

## Sheet: Data S2 DGRP Vial Totals
Line	Round	Vial	m♂	yw♂	Ryw♂	Ry♂	WT♂	y♂	R♀	Rm♀	Ry♀	WT♀	m♀	y♀	Total	Drive Conversion Efficiency	Embryo r2 Formation Rate (in flies with the drive)	Embryo r2 MosaicRate (in flies with the drive)	Embryo adjusted with 50% mosaic	Mosaic Difference	Male WT Rate
21	21	1	0	0	28	17	0	12	2	20	9	1	11	6	106	0.439252	0.290323	0.645161	0.612903	0.171662	0
21	21	2	0	0	33	14	0	11	0	18	6	1	12	0	95	0.448276	0.25	0.75	0.625	0.270331	0
21	21	3	0	0	33	16	0	15	0	28	19	0	8	3	122	0.566667	0.404255	0.595745	0.702128	0.155785	0
21	21	4	1	0	30	12	2	17	2	26	15	0	19	0	123	0.380952	0.348837	0.604651	0.651163	0.145406	0.0625
21	21	5	1	0	26	10	2	5	1	10	19	4	8	2	87	0.45	0.633333	0.333333	0.8	0.032825	0.111111
26	26	1	0	0	30	15	4	8	4	16	15	0	6	5	103	0.54	0.428571	0.457143	0.657143	0.0274224	0.148148
26	26	2	0	0	28	12	2	7	3	14	23	3	7	8	107	0.46	0.575	0.35	0.75	0.00485281	0.0952381
26	26	3	0	0	27	22	3	15	4	15	17	3	5	3	114	0.543307	0.472222	0.416667	0.680556	0.00804606	0.075
26	26	4	0	0	35	9	2	11	2	16	16	3	8	2	104	0.428571	0.470588	0.470588	0.705882	0.0611149	0.0909091
26	26	5	0	0	31	8	0	8	5	21	18	4	5	6	106	0.494505	0.409091	0.477273	0.647727	0.039263	0
26	26	6	0	0	34	13	0	10	3	20	24	1	4	2	111	0.66	0.510638	0.425532	0.723404	0.0383702	0
38	38	1	0	0	28	11	4	12	0	28	14	1	11	8	117	0.37931	0.333333	0.666667	0.666667	0.203033	0.148148
38	38	2	0	0	32	9	3	10	3	13	26	0	5	8	109	0.474747	0.619048	0.309524	0.77381	-0.0024932	0.136364
38	38	3	0	0	31	13	1	18	0	19	20	0	10	1	113	0.473684	0.512821	0.487179	0.75641	0.101318	0.03125
38	38	4	0	0	33	13	2	17	4	13	19	2	7	2	112	0.459459	0.527778	0.361111	0.708333	-0.0156039	0.0625
38	38	5	0	0	30	17	2	15	1	11	19	7	11	0	113	0.401709	0.612903	0.354839	0.790323	0.0379868	0.0588235
38	38	6	0	0	37	10	1	15	3	16	16	0	2	1	101	0.577778	0.457143	0.457143	0.685714	0.0408384	0.0384615
40	40	1	0	0	22	13	4	6	13	17	1	5	2	0	83	0.595238	0.0322581	0.548387	0.306452	0.0869021	0.173913
40	40	2	0	0	27	10	0	8	14	30	3	7	2	2	103	0.595745	0.0638298	0.638298	0.382979	0.168789	0
40	40	3	0	0	20	5	0	6	9	14	6	3	7	1	71	0.451613	0.206897	0.482759	0.448276	-0.000209512	0
40	40	4	0	0	34	11	3	8	5	12	4	5	2	1	85	0.479452	0.190476	0.571429	0.47619	0.0880993	0.136364
40	40	5	0	0	27	14	2	4	7	27	8	1	5	3	98	0.67033	0.190476	0.642857	0.511905	0.159528	0.1
40	40	6	0	1	23	8	1	10	2	29	3	8	12	3	100	0.284211	0.0882353	0.852941	0.514706	0.378482	0.0526316
45	45	1	0	0	24	12	2	7	15	16	12	4	2	2	96	0.634409	0.27907	0.372093	0.465116	-0.103428	0.0952381
45	45	2	0	0	40	17	6	3	16	24	10	2	5	0	123	0.706422	0.2	0.48	0.44	-0.00318	0.230769
45	45	3	0	0	25	18	1	8	4	42	5	5	5	2	115	0.641026	0.0980392	0.823529	0.509804	0.34739	0.037037
45	45	4	0	0	35	19	1	6	6	21	2	0	14	2	106	0.525773	0.0689655	0.724138	0.431034	0.253497	0.0384615
45	45	5	0	0	20	16	1	5	2	29	3	4	14	2	96	0.469388	0.0882353	0.852941	0.514706	0.378482	0.0454545
45	45	6	0	0	29	4	6	9	6	28	7	1	15	1	106	0.333333	0.170732	0.682927	0.512195	0.199818	0.315789
49	49	1	1	0	44	11	0	13	1	4	24	1	3	8	109	0.428571	0.827586	0.137931	0.896552	0.0310409	0
49	49	2	0	0	30	7	6	14	1	10	21	0	3	13	105	0.294118	0.65625	0.3125	0.8125	0.0312349	0.222222
49	49	3	0	0	38	21	1	3	0	10	32	2	2	6	115	0.72549	0.761905	0.238095	0.880952	0.0579986	0.04
49	49	4	0	0	44	12	2	12	1	10	48	2	7	10	148	0.492308	0.813559	0.169492	0.898305	0.0463034	0.0769231
49	49	5	0	0	36	13	0	4	0	13	23	6	5	6	106	0.517241	0.638889	0.361111	0.819444	0.0651794	0
49	49	6	0	0	27	28	0	6	0	16	31	2	4	4	118	0.744	0.659574	0.340426	0.829787	0.0620319	0
57	57	1	0	0	34	13	2	8	5	17	12	14	12	5	122	0.261261	0.352941	0.5	0.602941	0.0419896	0.0869565
57	57	2	0	0	56	16	9	11	24	36	15	11	5	2	185	0.539394	0.2	0.48	0.44	-0.00318	0.25
57	57	3	0	0	45	22	6	17	31	22	13	17	7	2	182	0.461538	0.19697	0.333333	0.363636	-0.149912	0.133333
57	57	4	3	0	42	23	4	12	16	26	14	9	13	2	161	0.47561	0.25	0.464286	0.482143	-0.015383	0.0952381
57	57	5	0	0	52	15	9	16	21	16	16	10	5	2	162	0.44	0.301887	0.301887	0.45283	-0.169293	0.225
57	57	6	0	0	45	16	2	8	14	25	17	12	3	0	142	0.593496	0.303571	0.446429	0.526786	-0.024393	0.0769231
59	59	1	0	0	69	35	3	13	16	30	21	8	7	3	205	0.636364	0.313433	0.447761	0.537313	-0.0208584	0.0588235
59	59	2	0	1	41	33	3	17	19	21	23	12	7	4	181	0.552083	0.365079	0.333333	0.531746	-0.120843	0.0566038
59	59	3	0	0	55	32	4	21	21	28	22	9	2	6	200	0.584158	0.309859	0.394366	0.507042	-0.075072	0.0701754
59	59	4	0	0	61	25	4	15	20	29	24	12	4	3	197	0.577778	0.328767	0.39726	0.527397	-0.0675813	0.0909091
59	59	5	0	0	38	21	8	11	25	27	23	7	6	2	168	0.6	0.306667	0.36	0.486667	-0.11015	0.2
59	59	6	0	0	56	29	3	8	16	29	21	10	13	0	185	0.597633	0.318182	0.439394	0.537879	-0.0281017	0.075
69	69	1	0	0	51	23	6	22	4	23	31	9	14	7	190	0.389474	0.534483	0.396552	0.732759	0.0240699	0.117647
69	69	2	0	0	46	38	3	22	6	33	29	6	9	8	200	0.557604	0.426471	0.485294	0.669118	0.0546463	0.047619
69	69	3	0	0	56	31	5	16	5	23	22	3	11	1	173	0.573964	0.44	0.46	0.67	0.0354664	0.0961538
69	69	4	0	0	45	15	7	20	6	26	22	9	17	3	170	0.329341	0.407407	0.481481	0.648148	0.0427881	0.166667
69	69	5	0	0	50	21	4	14	7	47	21	5	6	5	180	0.597633	0.28	0.626667	0.593333	0.151304	0.102564
69	69	6	1	1	38	18	2	16	3	40	37	3	12	3	173	0.569767	0.4625	0.5	0.7125	0.0863776	0.0540541
85	85	1	0	0	32	20	2	6	0	22	8	0	2	2	94	0.733333	0.266667	0.733333	0.633333	0.255853	0.0714286
85	85	2	0	0	29	19	1	10	2	20	7	1	5	0	94	0.642105	0.241379	0.689655	0.586207	0.209054	0.0333333
85	85	3	0	0	40	22	0	9	5	10	14	1	5	1	107	0.673469	0.482759	0.344828	0.655172	-0.0581767	0
85	85	4	0	1	29	21	2	12	1	28	16	0	5	2	117	0.655738	0.355556	0.622222	0.666667	0.165015	0.0571429
85	85	5	0	0	31	13	1	8	4	15	5	3	3	3	86	0.532468	0.208333	0.625	0.520833	0.142087	0.0454545
88	88	1	0	0	31	19	2	4	0	26	29	0	7	7	125	0.663866	0.527273	0.472727	0.763636	0.0956967	0.08
88	88	2	0	0	38	27	3	12	5	24	13	2	10	1	135	0.597122	0.309524	0.571429	0.595238	0.101915	0.0714286
88	88	3	2	0	32	21	1	13	3	30	18	2	9	1	130	0.591241	0.352941	0.588235	0.647059	0.130225	0.027027
88	88	4	0	0	33	15	1	8	1	36	16	2	6	1	119	0.672727	0.301887	0.679245	0.641509	0.208065	0.0416667
88	88	5	0	0	26	13	0	10	0	16	15	1	6	1	88	0.576471	0.483871	0.516129	0.741935	0.11373	0
101	101	1	0	0	20	14	2	6	3	28	6	1	4	1	85	0.678161	0.162162	0.756757	0.540541	0.273966	0.0909091
101	101	2	0	0	9	13	1	4	2	24	6	4	8	0	71	0.575	0.1875	0.75	0.5625	0.266658	0.0555556
101	101	3	0	0	19	14	1	6	3	29	6	2	8	1	89	0.604396	0.157895	0.763158	0.539474	0.280575	0.047619
101	101	4	0	0	10	12	2	6	3	21	5	3	7	0	69	0.544304	0.172414	0.724138	0.534483	0.240982	0.1
101	101	5	0	0	11	9	1	2	4	25	7	0	9	0	68	0.652174	0.194444	0.694444	0.541667	0.211157	0.0833333
109	109	1	0	0	44	20	6	21	14	28	10	3	3	0	149	0.565789	0.192308	0.538462	0.461538	0.0551481	0.12766
109	109	2	0	1	50	21	4	11	29	14	15	8	2	3	158	0.608392	0.258621	0.241379	0.37931	-0.237221	0.111111
109	109	3	0	0	37	12	2	7	15	38	12	2	1	0	126	0.781818	0.184615	0.584615	0.476923	0.101277	0.0952381
109	109	4	0	0	51	14	3	17	21	32	13	4	4	1	160	0.594406	0.19697	0.484848	0.439394	0.00160296	0.0882353
109	109	5	0	0	36	16	2	12	12	26	7	10	13	3	137	0.389313	0.155556	0.577778	0.444444	0.0953237	0.0666667
136	136	1	0	0	22	23	0	7	0	19	17	1	9	2	100	0.648148	0.472222	0.527778	0.736111	0.119157	0
136	136	2	0	0	58	29	2	28	0	43	34	0	16	7	217	0.513761	0.441558	0.558442	0.720779	0.134634	0.0338983
136	136	3	0	0	37	23	2	22	0	24	19	1	7	2	137	0.537415	0.44186	0.55814	0.72093	0.134473	0.0425532
136	136	4	0	0	53	18	3	18	3	12	20	5	8	3	143	0.426357	0.571429	0.342857	0.742857	-0.00482041	0.0769231
136	136	5	0	0	44	32	1	33	0	32	26	3	17	1	189	0.478673	0.448276	0.551724	0.724138	0.131096	0.0151515
138	138	1	0	0	40	22	0	22	7	14	30	6	6	4	151	0.509677	0.588235	0.27451	0.72549	-0.0610563	0
138	138	2	0	0	37	22	3	19	6	12	28	5	6	5	143	0.493333	0.608696	0.26087	0.73913	-0.0592533	0.0681818
138	138	3	0	0	32	18	1	14	4	11	27	3	5	5	120	0.53719	0.642857	0.261905	0.77381	-0.0307233	0.030303
138	138	4	0	0	48	25	2	20	8	14	35	4	4	4	164	0.582822	0.614035	0.245614	0.736842	-0.0703524	0.0425532
138	138	5	0	0	29	19	0	15	5	9	28	4	3	4	116	0.570248	0.666667	0.214286	0.77381	-0.0579143	0
153	153	1	0	0	39	18	3	24	2	42	10	0	20	6	164	0.376471	0.185185	0.777778	0.574074	0.294437	0.0666667
153	153	2	0	0	52	14	4	18	10	24	22	17	15	5	181	0.284848	0.392857	0.428571	0.607143	-0.0158147	0.111111
153	153	3	0	0	41	20	5	13	2	44	19	1	19	3	167	0.5	0.292308	0.676923	0.630769	0.203805	0.131579
153	153	4	0	0	48	16	5	23	8	12	11	24	19	13	179	0.04	0.354839	0.387097	0.548387	-0.070332	0.113636
153	153	5	0	0	33	23	3	18	1	49	13	4	16	3	163	0.494253	0.206349	0.777778	0.595238	0.29479	0.0681818
176	176	1	0	0	30	8	7	14	1	20	15	4	26	3	128	0.149606	0.416667	0.555556	0.694444	0.120687	0.241379
176	176	2	0	0	38	12	1	14	5	18	31	3	11	10	143	0.409091	0.574074	0.333333	0.740741	-0.0124721	0.037037
176	176	3	0	0	32	14	3	16	2	17	22	1	12	4	123	0.419355	0.536585	0.414634	0.743902	0.0434968	0.0909091
176	176	4	0	0	45	16	3	11	0	31	17	0	7	5	135	0.566667	0.354167	0.645833	0.677083	0.188198	0.1
176	176	5	0	0	16	7	1	18	0	18	20	2	14	3	99	0.302752	0.526316	0.473684	0.763158	0.0960571	0.0384615
177	177	1	1	2	36	13	2	9	2	13	34	1	4	2	118	0.641509	0.693878	0.265306	0.826531	0.0177249	0.08
177	177	2	0	0	46	24	0	8	2	9	40	0	1	4	134	0.783333	0.784314	0.176471	0.872549	0.0204616	0
177	177	3	0	0	35	22	0	6	0	15	42	0	5	5	130	0.739837	0.736842	0.263158	0.868421	0.0572116	0
177	177	4	0	0	30	20	2	6	2	7	25	1	0	2	95	0.763441	0.735294	0.205882	0.838235	-0.00162275	0.0714286
177	177	5	0	0	48	19	1	9	0	5	32	2	5	4	125	0.603774	0.864865	0.135135	0.932432	0.0733123	0.0344828
181	181	1	0	0	37	15	2	14	10	24	24	5	14	7	152	0.424658	0.413793	0.413793	0.62069	-0.0222794	0.0645161
181	181	2	0	0	39	10	0	21	1	26	16	3	10	1	127	0.411765	0.372093	0.604651	0.674419	0.152813	0
181	181	3	0	0	37	23	4	13	2	15	12	10	17	7	140	0.286713	0.413793	0.517241	0.672414	0.0811688	0.1
181	181	4	0	0	42	19	0	26	4	20	9	6	8	13	147	0.293333	0.272727	0.606061	0.575758	0.129503	0
181	181	5	1	0	26	14	4	20	7	26	16	10	20	1	144	0.291139	0.326531	0.530612	0.591837	0.0651928	0.102564
208	208	1	0	0	53	23	7	21	14	35	14	10	21	2	200	0.383838	0.222222	0.555556	0.5	0.0733704	0.137255
208	208	2	0	0	52	36	4	27	4	46	13	9	15	3	209	0.482143	0.206349	0.730159	0.571429	0.247171	0.0597015
208	208	3	0	0	35	24	6	13	11	38	15	12	9	6	169	0.480226	0.234375	0.59375	0.53125	0.112492	0.139535
208	208	4	0	0	58	32	4	24	7	40	10	6	20	1	202	0.460784	0.175439	0.701754	0.526316	0.218528	0.0666667
208	208	5	0	0	57	24	4	20	9	59	19	10	10	4	216	0.536232	0.218391	0.678161	0.557471	0.19574	0.0833333
223	223	1	0	0	55	21	1	16	4	26	52	5	5	11	196	0.575419	0.634146	0.317073	0.792683	0.0172311	0.0263158
223	223	2	0	0	61	25	0	19	4	38	36	5	9	5	202	0.589189	0.461538	0.487179	0.705128	0.0730718	0
223	223	3	0	0	50	16	6	12	6	33	36	7	11	10	187	0.461988	0.48	0.44	0.7	0.0355056	0.176471
223	223	4	0	0	46	33	3	15	3	35	38	1	6	2	182	0.71123	0.5	0.460526	0.730263	0.0671513	0.0588235
223	223	5	0	0	44	15	1	15	7	34	36	7	6	5	170	0.566879	0.467532	0.441558	0.688312	0.0305035	0.0322581
228	228	1	0	0	50	22	6	26	20	31	24	8	7	4	198	0.49505	0.32	0.413333	0.526667	-0.0537211	0.111111
228	228	2	0	0	64	38	3	17	25	27	28	25	2	7	236	0.530435	0.35	0.3375	0.51875	-0.121399	0.0517241
228	228	3	0	0	66	27	8	26	7	40	23	11	17	3	228	0.41704	0.328571	0.571429	0.614286	0.106536	0.131148
228	228	4	0	0	66	20	8	15	6	43	24	4	15	5	206	0.486339	0.328767	0.589041	0.623288	0.124199	0.186047
228	228	5	0	0	65	19	5	33	16	32	24	17	5	3	219	0.402844	0.333333	0.444444	0.555556	-0.0191889	0.0877193
235	235	1	0	0	53	24	4	13	4	31	31	7	7	6	180	0.559524	0.469697	0.469697	0.704545	0.0597605	0.097561
235	235	2	0	0	56	24	1	16	6	29	27	2	5	4	170	0.63871	0.435484	0.467742	0.669355	0.0411301	0.0243902
235	235	3	0	0	58	17	3	17	2	30	32	4	12	6	181	0.475	0.5	0.46875	0.734375	0.075375	0.0810811
235	235	4	0	0	53	30	4	17	13	38	20	6	11	3	195	0.57513	0.28169	0.535211	0.549296	0.0601406	0.0784314
235	235	5	0	0	61	30	1	16	5	28	32	3	8	5	189	0.622857	0.492308	0.430769	0.707692	0.0330308	0.0212766
239	239	1	0	0	49	18	2	9	17	26	21	8	8	1	159	0.597122	0.328125	0.40625	0.53125	-0.0587585	0.0689655
239	239	2	0	0	41	22	1	16	13	18	20	10	6	6	153	0.483444	0.392157	0.352941	0.568627	-0.0917091	0.025641
239	239	3	0	0	37	18	2	7	9	36	15	8	6	1	139	0.627907	0.25	0.6	0.55	0.120331	0.0740741
239	239	4	0	0	56	30	2	13	4	40	21	5	11	2	184	0.618497	0.323077	0.615385	0.630769	0.149091	0.0444444
239	239	5	0	0	28	27	1	4	21	25	16	3	2	0	127	0.847328	0.258065	0.403226	0.459677	-0.0754475	0.03125
272	272	1	0	0	23	12	0	7	6	10	20	2	3	3	86	0.634146	0.555556	0.277778	0.694444	-0.080863	0
272	272	2	0	0	40	22	2	15	10	20	33	5	6	7	160	0.559748	0.52381	0.31746	0.68254	-0.0617213	0.0512821
272	272	3	0	1	28	16	0	11	8	15	24	3	4	4	114	0.607143	0.510638	0.319149	0.670213	-0.0680128	0
272	272	4	0	0	33	11	1	11	6	15	32	4	5	6	124	0.526316	0.603774	0.283019	0.745283	-0.0408892	0.0434783
272	272	5	0	0	28	19	0	12	7	8	24	4	4	4	110	0.575221	0.615385	0.205128	0.717949	-0.109779	0
280	280	1	0	0	37	22	2	10	20	8	28	17	6	3	153	0.493333	0.5	0.142857	0.571429	-0.250518	0.0588235
280	280	1	0	0	43	27	1	14	8	21	22	4	13	14	167	0.445783	0.431373	0.411765	0.637255	-0.0167066	0.0238095
280	280	1	0	0	48	25	3	20	2	34	45	2	12	7	198	0.555556	0.555556	0.419753	0.765432	0.0611123	0.0625
280	280	2	0	0	47	30	1	11	33	20	23	5	3	2	175	0.741176	0.302632	0.263158	0.434211	-0.207864	0.0238095
280	280	2	0	0	44	30	4	25	20	2	29	9	5	13	181	0.428571	0.568627	0.0392157	0.588235	-0.31043	0.0677966
280	280	2	0	0	29	17	6	96	3	27	39	3	12	9	241	0.238671	0.565217	0.391304	0.76087	0.0392819	0.0504202
280	280	3	0	0	39	38	3	16	2	12	27	3	9	13	162	0.511111	0.658537	0.292683	0.804878	0.0133907	0.0526316
280	280	3	0	0	51	15	4	20	4	27	30	2	6	7	166	0.493506	0.491803	0.442623	0.713115	0.0446021	0.102564
280	280	3	0	0	45	25	5	13	30	24	19	8	3	3	175	0.630058	0.260274	0.328767	0.424658	-0.149613	0.116279
280	280	4	0	0	40	29	7	16	18	22	16	9	4	3	164	0.556818	0.285714	0.392857	0.482143	-0.081498	0.134615
280	280	4	0	0	61	28	1	20	13	6	29	20	3	10	191	0.396648	0.604167	0.125	0.666667	-0.198607	0.0204082
280	280	4	0	0	57	23	3	22	0	31	47	4	11	13	211	0.475248	0.602564	0.397436	0.801282	0.0726045	0.0625
280	280	5	0	0	41	17	6	21	17	14	27	14	1	1	159	0.469136	0.465517	0.241379	0.586207	-0.170709	0.136364
280	280	5	0	0	35	20	7	16	4	36	30	5	8	5	166	0.528736	0.428571	0.514286	0.685714	0.0845653	0.162791
287	287	1	0	0	38	21	2	10	2	18	23	0	8	8	130	0.552	0.534884	0.418605	0.744186	0.0463786	0.0606061
287	287	2	1	0	38	27	0	16	0	32	29	3	14	11	170	0.491525	0.47541	0.52459	0.737705	0.117647	0
287	287	3	0	0	37	21	1	16	2	15	27	5	8	5	137	0.492754	0.613636	0.340909	0.784091	0.0246304	0.0263158
287	287	4	0	0	36	31	1	10	1	37	25	0	13	5	159	0.648485	0.396825	0.587302	0.690476	0.14443	0.0238095
287	287	5	0	0	60	27	1	11	6	27	43	2	13	9	199	0.595506	0.565789	0.355263	0.743421	0.0036379	0.025641
304	304	1	1	1	37	15	1	11	6	37	5	4	6	2	125	0.568966	0.104167	0.770833	0.489583	0.293732	0.0357143
304	304	2	0	1	33	14	3	6	50	10	12	9	1	0	139	0.703125	0.166667	0.138889	0.236111	-0.344086	0.130435
304	304	3	3	0	39	22	1	10	10	33	9	5	2	0	131	0.679389	0.173077	0.634615	0.490385	0.151443	0.0277778
304	304	4	1	0	35	28	2	10	10	29	12	5	10	3	144	0.589404	0.235294	0.568627	0.519608	0.0874503	0.0487805
304	304	5	0	0	22	19	3	10	14	40	6	9	7	1	131	0.574468	0.1	0.666667	0.433333	0.190212	0.09375
309	309	1	6	0	46	7	1	18	2	33	15	7	33	3	165	0.133758	0.3	0.66	0.63	0.188425	0.03125
309	309	2	0	0	45	22	8	5	0	42	20	3	15	6	166	0.525641	0.322581	0.677419	0.66129	0.211002	0.228571
309	309	3	0	0	55	17	2	19	12	23	12	7	10	4	161	0.416667	0.255319	0.489362	0.5	0.0103362	0.0526316
309	309	4	0	0	28	21	4	17	2	38	14	5	13	0	142	0.5	0.259259	0.703704	0.611111	0.225188	0.0952381
309	309	5	0	0	44	20	3	12	8	32	9	3	9	1	141	0.575758	0.183673	0.653061	0.510204	0.169727	0.0857143
310	310	1	0	0	35	12	1	8	2	10	25	2	7	2	104	0.555556	0.675676	0.27027	0.810811	0.00607078	0.047619
310	310	2	0	0	35	18	1	13	4	11	34	2	11	10	139	0.455882	0.693878	0.22449	0.806122	-0.0230915	0.03125
310	310	3	0	0	37	13	2	15	1	14	24	1	12	6	125	0.389831	0.615385	0.358974	0.794872	0.0440667	0.0666667
310	310	4	0	0	28	19	1	11	1	14	25	2	8	6	115	0.525424	0.625	0.35	0.8	0.0427328	0.0322581
310	310	5	0	0	37	16	2	14	2	19	30	1	10	6	137	0.5	0.588235	0.372549	0.77451	0.0369829	0.0625
317	317	1	0	0	50	21	5	14	22	13	18	18	8	4	173	0.398773	0.339623	0.245283	0.462264	-0.216623	0.125
317	317	2	0	0	52	16	0	21	21	12	17	17	6	4	166	0.364238	0.34	0.24	0.46	-0.221801	0
317	317	3	0	0	60	18	1	15	21	29	11	11	7	5	178	0.486842	0.180328	0.47541	0.418033	-0.00789549	0.0294118
317	317	4	0	0	48	28	6	11	18	14	12	12	12	4	165	0.444444	0.272727	0.318182	0.431818	-0.158376	0.133333
317	317	5	0	0	58	29	5	10	21	30	10	10	16	8	197	0.464481	0.163934	0.491803	0.409836	0.00893539	0.113636
321	321	1	1	0	45	31	0	11	2	28	29	8	8	5	167	0.60241	0.491525	0.474576	0.728814	0.0764001	0
321	321	2	0	0	40	32	0	16	3	31	36	4	12	6	180	0.595745	0.514286	0.442857	0.735714	0.0578735	0
321	321	3	0	0	38	31	2	18	1	30	28	2	8	3	161	0.62069	0.474576	0.508475	0.728814	0.101091	0.0392157
321	321	4	0	0	52	26	0	10	0	19	37	5	13	4	166	0.573333	0.660714	0.339286	0.830357	0.0618813	0
321	321	5	0	0	49	24	2	18	3	24	20	5	18	11	174	0.360947	0.425532	0.510638	0.680851	0.0795787	0.0454545
350	350	1	0	0	39	17	4	11	37	24	9	16	6	2	165	0.506329	0.128571	0.342857	0.3	-0.13739	0.125
350	350	2	1	1	49	19	1	7	21	17	7	10	8	1	141	0.533333	0.155556	0.377778	0.344444	-0.104676	0.0357143
350	350	3	0	0	45	13	4	13	29	13	13	17	2	3	152	0.430657	0.236364	0.236364	0.354545	-0.244717	0.133333
350	350	4	0	0	41	19	6	88	18	12	7	24	6	5	226	0.134228	0.189189	0.324324	0.351351	-0.159012	0.0530973
350	350	5	0	0	43	11	6	15	11	24	6	14	14	0	144	0.263158	0.146341	0.585366	0.439024	0.103515	0.1875
356	356	1	0	0	52	33	2	15	6	40	23	5	12	1	189	0.625668	0.333333	0.57971	0.623188	0.116077	0.04
356	356	2	0	0	52	29	1	18	0	33	32	0	13	3	181	0.60452	0.492308	0.507692	0.746154	0.109954	0.0208333
356	356	3	0	0	56	28	1	24	2	38	33	1	13	4	200	0.563452	0.452055	0.520548	0.712329	0.101745	0.0188679
356	356	4	2	0	41	23	0	18	1	30	27	3	17	5	165	0.467456	0.465517	0.517241	0.724138	0.105153	0
356	356	5	0	0	39	14	3	18	7	30	33	3	18	5	170	0.433735	0.471429	0.428571	0.685714	0.019536	0.0857143
357	357	1	0	0	33	21	9	5	18	34	19	9	8	0	156	0.607595	0.267606	0.478873	0.507042	0.0015317	0.257143
357	357	2	0	0	50	11	4	14	7	28	17	6	10	3	150	0.426357	0.326923	0.538462	0.596154	0.0731428	0.137931
357	357	3	0	0	55	22	1	5	5	47	12	1	15	4	167	0.628571	0.1875	0.734375	0.554688	0.251033	0.0357143
357	357	4	0	0	52	24	5	18	2	47	7	3	17	3	178	0.468208	0.125	0.839286	0.544643	0.359431	0.106383
357	357	5	0	0	44	21	4	25	7	46	9	2	15	3	176	0.461538	0.145161	0.741935	0.516129	0.260174	0.08
358	358	1	0	1	68	11	7	14	6	50	14	14	14	4	203	0.361446	0.2	0.714286	0.557143	0.231106	0.21875
358	358	2	0	0	67	20	5	18	5	37	16	13	11	3	195	0.415205	0.275862	0.637931	0.594828	0.161877	0.116279
358	358	3	0	0	51	23	5	13	7	49	14	8	22	2	194	0.456522	0.2	0.7	0.55	0.21682	0.121951
358	358	4	0	0	38	21	5	18	6	35	5	6	16	2	152	0.405063	0.108696	0.76087	0.48913	0.283102	0.113636
358	358	5	0	0	49	21	3	17	30	18	12	9	1	1	161	0.594771	0.2	0.3	0.35	-0.18318	0.0731707
360	360	1	0	0	56	29	4	7	0	33	43	3	5	7	187	0.695906	0.565789	0.434211	0.782895	0.0825853	0.1
360	360	2	0	0	43	19	3	23	1	27	29	3	13	9	170	0.406977	0.508772	0.473684	0.745614	0.0854175	0.0666667
360	360	3	0	0	65	36	3	15	0	49	38	2	13	10	231	0.609091	0.436782	0.563218	0.718391	0.1372	0.0555556
360	360	4	0	0	64	23	3	22	2	26	32	2	8	8	190	0.505747	0.533333	0.433333	0.75	0.06012	0.0625
360	360	5	2	0	37	29	1	28	2	40	30	3	17	9	196	0.457014	0.416667	0.555556	0.694444	0.120687	0.0166667
361	361	1	1	0	29	26	4	7	5	17	41	4	3	6	142	0.671053	0.650794	0.269841	0.785714	-0.0160929	0.105263
361	361	2	0	1	28	22	0	14	0	14	28	1	11	5	124	0.526718	0.666667	0.333333	0.833333	0.0611333	0
361	361	3	0	0	25	32	3	11	2	27	36	1	8	2	147	0.702381	0.553846	0.415385	0.761538	0.0555908	0.0652174
361	361	4	0	0	23	30	1	11	4	13	37	2	10	5	136	0.625806	0.685185	0.240741	0.805556	-0.0148524	0.0238095
361	361	5	0	0	17	27	3	14	5	7	29	5	0	8	115	0.577465	0.707317	0.170732	0.792683	-0.0641896	0.0681818
362	362	1	0	0	55	26	5	12	15	40	8	11	10	3	185	0.526012	0.126984	0.634921	0.444444	0.154845	0.116279
362	362	2	0	0	60	24	1	15	17	21	8	9	9	0	164	0.527778	0.173913	0.456522	0.402174	-0.0266711	0.025
362	362	3	0	0	49	30	2	21	12	45	7	7	1	1	175	0.642458	0.109375	0.703125	0.460938	0.225261	0.0377358
362	362	4	3	0	51	25	4	22	10	33	8	7	11	1	172	0.460674	0.156863	0.647059	0.480392	0.164532	0.0740741
362	362	5	3	0	58	33	1	25	10	39	11	7	12	1	197	0.519608	0.183333	0.65	0.508333	0.166668	0.016129
365	365	1	0	0	9	5	0	3	1	6	6	1	3	0	34	0.575758	0.461538	0.461538	0.692308	0.0474308	0
365	365	2	0	0	4	3	0	2	0	7	8	2	3	2	31	0.4375	0.533333	0.466667	0.766667	0.0934533	0
365	365	3	0	0	15	5	0	3	1	9	11	2	4	0	50	0.581395	0.52381	0.428571	0.738095	0.0493898	0
365	365	4	0	0	11	7	0	2	1	6	7	1	3	0	38	0.666667	0.5	0.428571	0.714286	0.0351964	0
365	365	5	0	0	10	5	0	2	1	2	2	1	0	0	23	0.7	0.4	0.4	0.6	-0.04164	0
367	367	1	1	0	40	19	2	21	18	31	7	5	7	0	150	0.532468	0.125	0.553571	0.401786	0.0737167	0.0465116
367	367	2	0	0	36	7	5	3	10	32	8	9	4	2	116	0.515789	0.16	0.64	0.48	0.15731	0.333333
367	367	3	0	0	51	10	1	17	6	31	10	9	5	4	144	0.404959	0.212766	0.659574	0.542553	0.176855	0.0357143
367	367	4	0	0	46	19	5	3	7	27	9	5	13	0	134	0.547826	0.209302	0.627907	0.523256	0.145033	0.185185
367	367	5	0	0	42	16	2	4	12	44	6	5	5	1	137	0.709402	0.0967742	0.709677	0.451613	0.233745	0.0909091
370	370	1	0	0	34	10	0	8	1	29	27	3	6	3	121	0.619048	0.473684	0.508772	0.72807	0.100918	0
370	370	2	0	0	43	17	1	25	2	24	16	7	13	4	152	0.342105	0.380952	0.571429	0.666667	0.122673	0.0232558
370	370	3	0	0	44	28	4	11	0	36	17	1	14	1	156	0.6	0.320755	0.679245	0.660377	0.212376	0.0930233
370	370	4	0	0	25	13	0	25	1	24	19	0	18	6	131	0.319444	0.431818	0.545455	0.704545	0.117183	0
370	370	5	0	0	52	17	2	19	0	32	23	0	10	3	158	0.527778	0.418182	0.581818	0.709091	0.14759	0.0526316
373	373	1	1	0	34	21	1	10	5	29	17	6	16	1	140	0.5	0.333333	0.568627	0.617647	0.104994	0.030303
373	373	2	0	0	41	22	3	16	1	23	17	8	11	0	142	0.464789	0.414634	0.560976	0.695122	0.125254	0.0731707
373	373	3	1	0	39	26	1	8	2	16	14	3	7	1	117	0.634783	0.4375	0.5	0.6875	0.0743113	0.0277778
373	373	4	0	0	49	25	0	13	18	25	17	9	8	2	166	0.587097	0.283333	0.416667	0.491667	-0.0581154	0
373	373	5	2	0	47	24	3	21	12	10	15	6	15	0	153	0.405063	0.405405	0.27027	0.540541	-0.169229	0.06
374	374	1	0	0	32	17	5	12	3	29	17	1	11	3	130	0.515152	0.346939	0.591837	0.642857	0.13203	0.147059
374	374	2	0	0	35	19	2	4	3	23	20	4	8	4	122	0.607143	0.434783	0.5	0.684783	0.0730688	0.08
374	374	3	2	0	38	10	2	9	1	16	11	5	10	3	105	0.326087	0.392857	0.571429	0.678571	0.127042	0.0869565
374	374	4	0	1	27	20	1	8	1	25	16	3	8	3	113	0.596491	0.380952	0.595238	0.678571	0.146483	0.0344828
374	374	5	0	0	24	32	1	4	0	10	31	2	9	4	117	0.692308	0.756098	0.243902	0.878049	0.0577138	0.027027
377	377	1	1	0	25	14	1	12	1	18	11	3	10	6	101	0.371429	0.366667	0.6	0.666667	0.146345	0.0357143
377	377	2	0	0	22	10	0	13	2	22	10	4	3	1	87	0.522727	0.294118	0.647059	0.617647	0.174294	0
377	377	3	0	0	15	11	3	7	2	23	15	3	5	2	86	0.565217	0.375	0.575	0.6625	0.124158	0.142857
377	377	4	0	0	34	12	2	10	4	23	12	1	5	3	106	0.5625	0.307692	0.589744	0.602564	0.119821	0.0833333
377	377	5	0	0	32	16	0	12	3	26	15	3	5	3	115	0.585586	0.340909	0.590909	0.636364	0.129365	0
381	381	1	0	0	41	18	4	9	5	25	25	2	6	1	136	0.650794	0.454545	0.454545	0.681818	0.0369595	0.129032
381	381	2	0	0	36	13	1	10	3	18	32	2	3	3	121	0.651376	0.603774	0.339623	0.773585	0.0157146	0.0416667
381	381	3	0	0	35	17	1	9	6	14	19	1	2	1	105	0.71134	0.487179	0.358974	0.666667	-0.0416128	0.037037
381	381	4	0	0	26	17	0	4	4	15	39	3	2	4	114	0.761468	0.672414	0.258621	0.801724	-0.00849272	0
381	381	5	0	0	43	32	0	6	9	16	35	6	2	3	152	0.768707	0.583333	0.266667	0.716667	-0.0724854	0
383	383	1	0	0	24	15	3	15	3	11	20	4	7	10	112	0.355372	0.588235	0.323529	0.75	-0.0120367	0.0909091
383	383	2	0	0	36	20	1	23	3	20	20	3	11	4	141	0.436242	0.465116	0.465116	0.697674	0.0528228	0.0227273
383	383	3	0	0	31	16	0	12	2	27	39	0	5	2	134	0.709924	0.573529	0.397059	0.772059	0.0508669	0
383	383	4	0	0	31	13	1	12	5	29	26	3	11	3	134	0.534884	0.433333	0.483333	0.675	0.055745	0.0384615
383	383	5	0	0	37	10	2	11	5	14	30	1	5	4	119	0.561905	0.612245	0.285714	0.755102	-0.0316516	0.0869565
385	385	1	0	0	38	17	1	15	0	15	23	0	6	8	123	0.491525	0.605263	0.394737	0.802632	0.0719696	0.030303
385	385	2	0	0	52	20	2	16	2	17	60	0	8	3	180	0.650602	0.759494	0.21519	0.867089	0.0325564	0.0526316
385	385	3	0	0	40	20	1	18	0	9	50	0	0	6	144	0.65035	0.847458	0.152542	0.923729	0.0693584	0.025641
385	385	4	0	0	57	10	1	15	3	6	42	0	7	9	150	0.462185	0.823529	0.117647	0.882353	0.00600623	0.0384615
385	385	5	0	0	51	10	4	17	4	13	38	0	9	11	157	0.40146	0.690909	0.236364	0.809091	-0.0139693	0.129032
386	386	1	0	0	29	16	4	14	6	14	18	4	0	9	114	0.478992	0.473684	0.368421	0.657895	-0.0394324	0.117647
386	386	2	0	0	30	23	0	15	20	16	22	2	2	0	130	0.724638	0.37931	0.275862	0.517241	-0.173475	0
386	386	3	0	0	46	17	2	12	2	14	23	0	4	5	125	0.581818	0.589744	0.358974	0.769231	0.0245205	0.0645161
386	386	4	0	1	32	17	2	13	5	20	28	2	4	0	124	0.658537	0.528302	0.377358	0.716981	0.000971378	0.0625
386	386	5	0	0	36	21	1	14	7	26	24	4	5	2	140	0.628571	0.421053	0.45614	0.649123	0.0231381	0.0277778
391	391	1	0	0	40	29	0	8	9	16	43	0	3	4	152	0.798658	0.632353	0.235294	0.75	-0.066016	0
391	391	2	0	0	59	28	1	8	3	11	46	2	2	2	162	0.785714	0.766667	0.183333	0.858333	0.00827833	0.027027
391	391	3	0	0	43	18	0	9	5	14	50	0	2	3	144	0.78125	0.724638	0.202899	0.826087	-0.0152185	0
391	391	4	0	0	45	18	1	10	4	15	41	1	11	14	160	0.486111	0.683333	0.25	0.808333	-0.00728208	0.0344828
391	391	5	0	0	56	31	1	17	2	9	66	3	3	5	193	0.688172	0.857143	0.116883	0.915584	0.0455158	0.0204082
399	399	1	0	0	56	14	2	15	4	26	28	4	8	3	160	0.525926	0.482759	0.448276	0.706897	0.0452716	0.0645161
399	399	2	0	0	53	10	0	21	5	29	14	4	11	0	147	0.424	0.291667	0.604167	0.59375	0.130924	0
399	399	3	0	0	45	8	3	27	3	30	15	1	6	2	140	0.413534	0.3125	0.625	0.625	0.156164	0.0789474
399	399	4	0	0	35	13	0	25	5	28	22	5	15	6	154	0.350318	0.4	0.509091	0.654545	0.0674509	0
399	399	5	0	0	51	12	3	16	6	19	28	0	9	0	144	0.548387	0.528302	0.358491	0.707547	-0.0178965	0.0967742
405	405	1	0	0	38	9	6	27	13	23	10	9	15	2	152	0.24359	0.217391	0.5	0.467391	0.0175216	0.142857
405	405	2	0	0	37	11	1	13	29	17	12	16	4	4	144	0.424242	0.206897	0.293103	0.353448	-0.189865	0.04
405	405	3	0	0	42	14	2	14	23	12	8	12	6	0	133	0.438017	0.186047	0.27907	0.325581	-0.204272	0.0666667
405	405	4	0	0	41	14	2	16	21	23	13	14	10	0	154	0.42069	0.22807	0.403509	0.429825	-0.0782642	0.0625
405	405	5	0	0	35	38	1	0	25	24	28	2	0	0	153	0.961783	0.363636	0.311688	0.519481	-0.142958	0.025641
406	406	1	0	0	54	40	2	1	2	24	36	0	1	2	162	0.92053	0.580645	0.387097	0.774194	0.0459969	0.0465116
406	406	2	0	0	38	15	3	17	5	15	28	5	4	5	135	0.484848	0.583333	0.3125	0.739583	-0.0266521	0.0857143
406	406	3	0	0	43	17	0	21	4	23	34	5	7	11	165	0.45	0.557377	0.377049	0.745902	0.0196431	0
406	406	4	0	0	38	31	1	17	9	8	29	5	5	8	151	0.555556	0.630435	0.173913	0.717391	-0.128961	0.0204082
406	406	5	0	0	46	35	0	0	11	12	46	1	1	1	153	0.957746	0.666667	0.173913	0.753623	-0.098287	0
409	409	1	0	0	50	8	0	37	5	26	34	0	11	12	183	0.325843	0.523077	0.4	0.723077	0.0203662	0
409	409	2	0	0	48	8	2	26	1	21	36	4	3	7	156	0.416667	0.62069	0.362069	0.801724	0.0513558	0.0555556
409	409	3	0	0	39	14	0	23	1	19	27	1	10	8	142	0.4	0.574468	0.404255	0.776596	0.0587298	0
409	409	4	0	0	54	27	0	17	1	26	41	2	6	11	185	0.588571	0.602941	0.382353	0.794118	0.0578091	0
409	409	5	0	0	52	21	1	10	15	21	26	1	4	15	166	0.575342	0.419355	0.33871	0.58871	-0.0950193	0.03125
427	427	1	0	0	35	25	1	6	38	10	3	14	6	1	139	0.588235	0.0588235	0.196078	0.156863	-0.27228	0.03125
427	427	2	1	0	47	19	6	16	27	29	6	23	12	0	185	0.359116	0.0967742	0.467742	0.330645	-0.00819095	0.142857
427	427	3	2	0	48	21	0	17	21	36	7	10	12	1	173	0.497006	0.109375	0.5625	0.390625	0.0846359	0
427	427	4	0	0	40	21	5	18	30	28	2	16	0	1	161	0.515152	0.0333333	0.466667	0.266667	0.00487833	0.113636
427	427	5	2	0	36	20	0	25	39	9	3	30	0	1	163	0.340909	0.0588235	0.176471	0.147059	-0.291888	0
437	437	1	1	0	61	31	7	11	13	36	10	12	13	2	196	0.505376	0.169492	0.610169	0.474576	0.127098	0.14
437	437	2	0	0	60	26	4	19	9	46	31	89	12	1	297	0.125874	0.360465	0.534884	0.627907	0.0792181	0.0816327
437	437	3	1	0	42	27	4	18	10	51	9	14	12	0	187	0.5	0.128571	0.728571	0.492857	0.248325	0.08
437	437	4	0	0	45	24	1	19	13	46	20	13	13	5	199	0.484848	0.253165	0.582278	0.544304	0.102986	0.0227273
437	437	5	0	0	58	27	5	18	17	61	18	13	9	0	226	0.587156	0.1875	0.635417	0.505208	0.152075	0.1
440	440	1	0	0	25	12	1	8	30	7	5	14	3	1	106	0.470588	0.119048	0.166667	0.202381	-0.312482	0.047619
440	440	2	0	0	50	23	1	24	60	14	12	29	2	2	217	0.460465	0.139535	0.162791	0.22093	-0.318514	0.0208333
440	440	3	0	0	28	15	1	15	31	8	6	15	2	0	121	0.467742	0.133333	0.177778	0.222222	-0.302956	0.0322581
440	440	4	0	0	31	18	0	16	41	9	8	12	2	3	140	0.538462	0.137931	0.155172	0.215517	-0.325991	0
440	440	5	0	0	22	13	0	15	25	6	5	14	1	0	101	0.439252	0.138889	0.166667	0.222222	-0.314582	0
441	441	1	0	0	42	20	2	19	17	31	11	8	10	1	161	0.5	0.186441	0.525424	0.449153	0.0420814	0.0487805
441	441	2	0	0	51	15	2	19	11	35	12	4	11	1	161	0.493151	0.206897	0.603448	0.508621	0.12048	0.0555556
441	441	3	0	0	48	18	4	21	17	32	8	4	5	0	157	0.552632	0.140351	0.561404	0.421053	0.080029	0.0930233
441	441	4	0	0	37	13	1	14	13	24	14	4	5	2	127	0.559322	0.27451	0.470588	0.509804	-0.00568558	0.0357143
441	441	5	0	0	42	27	4	10	15	8	21	10	2	3	142	0.588652	0.477273	0.181818	0.568182	-0.224136	0.097561
443	443	1	0	0	52	25	4	8	7	20	25	5	8	5	159	0.583333	0.480769	0.384615	0.673077	-0.0194649	0.108108
443	443	2	1	0	52	23	4	16	8	25	23	7	8	4	170	0.509202	0.410714	0.446429	0.633929	0.00908307	0.0909091
443	443	3	0	0	40	26	0	16	3	12	28	3	4	8	140	0.56338	0.651163	0.27907	0.790698	-0.00655024	0
443	443	4	0	0	60	20	6	15	6	7	29	4	4	6	157	0.492754	0.690476	0.166667	0.77381	-0.0840662	0.146341
443	443	5	0	0	53	20	2	11	15	2	24	10	0	5	142	0.540984	0.585366	0.0487805	0.609756	-0.28889	0.0606061
461	461	1	0	0	41	18	3	24	8	26	25	9	8	0	162	0.46988	0.423729	0.440678	0.644068	0.00883197	0.0666667
461	461	2	0	0	49	21	1	17	7	20	28	4	7	2	156	0.575342	0.509091	0.363636	0.690909	-0.024442	0.025641
461	461	3	0	0	48	18	2	14	7	17	39	7	4	0	156	0.619718	0.619048	0.269841	0.753968	-0.0421757	0.0588235
461	461	4	0	0	40	10	1	13	6	12	15	21	9	6	133	0.145299	0.454545	0.363636	0.636364	-0.0539496	0.0416667
461	461	5	0	0	53	12	4	22	7	23	31	2	11	0	165	0.48	0.508197	0.377049	0.696721	-0.0115569	0.105263
486	486	1	0	0	62	17	0	20	5	46	37	3	5	1	196	0.660819	0.420455	0.522727	0.681818	0.0894685	0
486	486	2	0	0	42	10	3	34	3	16	47	0	1	1	157	0.518519	0.712121	0.242424	0.833333	0.0121087	0.0638298
486	486	3	0	0	23	12	2	18	10	25	33	0	2	5	130	0.611511	0.485294	0.367647	0.669118	-0.0339753	0.0625
486	486	4	0	0	52	23	2	11	5	46	30	3	2	1	175	0.761006	0.37037	0.567901	0.654321	0.115481	0.0555556
486	486	5	0	0	45	31	0	9	8	21	30	1	5	1	151	0.780822	0.508475	0.355932	0.686441	-0.03251	0
492	492	1	0	0	51	28	6	13	21	24	4	13	13	0	173	0.467456	0.0816327	0.489796	0.326531	0.0165687	0.12766
492	492	2	0	0	35	15	2	5	15	29	7	11	5	0	124	0.585586	0.137255	0.568627	0.421569	0.0875247	0.0909091
492	492	3	0	0	42	11	1	14	20	29	3	15	3	0	138	0.459016	0.0576923	0.557692	0.336538	0.0896005	0.0384615
492	492	4	0	0	40	17	2	4	14	28	3	19	6	2	135	0.440678	0.0666667	0.622222	0.377778	0.152082	0.0869565
492	492	5	0	0	28	19	1	10	12	42	8	14	8	2	144	0.520548	0.129032	0.677419	0.467742	0.197124	0.0333333
513	513	1	0	0	35	14	2	11	2	15	30	0	5	2	116	0.62963	0.638298	0.319149	0.797872	0.0227277	0.0740741
513	513	2	0	0	42	19	0	17	3	23	24	2	4	16	150	0.458333	0.48	0.46	0.71	0.0555056	0
513	513	3	0	0	41	21	2	14	3	30	31	1	7	6	156	0.605263	0.484375	0.46875	0.71875	0.0666253	0.0540541
513	513	4	0	0	41	15	2	13	2	25	37	3	12	2	152	0.546099	0.578125	0.390625	0.773438	0.0477111	0.0666667
513	513	5	0	0	37	30	0	11	2	16	33	3	5	13	150	0.584416	0.647059	0.313725	0.803922	0.0246269	0
514	514	1	0	1	57	9	7	14	43	5	9	30	3	4	182	0.246753	0.157895	0.0877193	0.201754	-0.394863	0.233333
514	514	2	0	0	54	21	8	10	44	11	8	31	4	1	192	0.389831	0.126984	0.174603	0.214286	-0.305472	0.205128
514	514	3	0	0	52	10	13	13	51	3	9	32	1	2	186	0.282353	0.142857	0.047619	0.166667	-0.433963	0.361111
514	514	4	0	0	35	8	16	12	36	3	6	20	1	0	137	0.289855	0.133333	0.0666667	0.166667	-0.414067	0.444444
514	514	5	0	1	44	8	16	9	33	5	3	17	2	0	138	0.301587	0.0731707	0.121951	0.134146	-0.349581	0.484848
554	554	1	0	0	43	28	0	8	7	21	44	1	4	6	162	0.754839	0.611111	0.291667	0.756944	-0.0265824	0
554	554	2	0	0	38	24	1	15	2	33	34	0	12	0	159	0.652174	0.492754	0.478261	0.731884	0.0807724	0.025
554	554	3	0	0	38	16	2	12	6	10	55	1	6	0	146	0.695652	0.774648	0.140845	0.84507	-0.0256667	0.0666667
554	554	4	0	0	46	27	2	16	4	27	24	5	11	6	168	0.520958	0.436364	0.490909	0.681818	0.0646992	0.0444444
554	554	5	0	0	36	28	2	20	5	14	35	0	10	4	154	0.571429	0.648148	0.259259	0.777778	-0.028919	0.04
555	555	1	0	0	39	12	2	22	6	34	32	0	5	1	153	0.6	0.444444	0.472222	0.680556	0.0497704	0.0555556
555	555	2	0	0	50	24	0	9	18	17	22	6	6	1	153	0.676471	0.385965	0.298246	0.535088	-0.148702	0
555	555	3	0	0	36	25	2	13	23	29	14	8	2	5	157	0.627329	0.212121	0.439394	0.431818	-0.0433556	0.05
555	555	4	0	0	48	24	1	4	17	18	35	7	41	2	197	0.382022	0.5	0.257143	0.628571	-0.136232	0.0344828
555	555	5	0	0	34	35	0	5	4	17	34	2	7	7	145	0.721854	0.618182	0.309091	0.772727	-0.00361157	0
563	563	1	0	1	39	15	0	17	5	20	23	1	6	2	129	0.570248	0.479167	0.416667	0.6875	0.0117249	0
563	563	2	0	0	46	10	5	13	6	12	34	2	4	3	135	0.538462	0.653846	0.230769	0.769231	-0.0525596	0.178571
563	563	3	0	0	33	11	2	13	4	19	24	8	5	1	120	0.486726	0.510638	0.404255	0.712766	0.0170936	0.0769231
563	563	4	0	0	25	20	1	11	9	9	20	3	1	1	100	0.682243	0.526316	0.236842	0.644737	-0.140785	0.03125
563	563	5	0	0	33	13	0	15	2	21	20	0	1	0	105	0.68	0.465116	0.488372	0.709302	0.0760786	0
584	584	1	0	0	7	4	0	2	3	2	4	1	0	1	24	0.652174	0.444444	0.222222	0.555556	-0.20023	0
584	584	2	0	1	5	5	1	3	3	3	14	1	2	2	40	0.581395	0.7	0.15	0.775	-0.091855	0.111111
584	584	3	0	0	11	7	0	3	1	3	4	0	1	1	31	0.666667	0.5	0.375	0.6875	-0.018375	0
584	584	4	0	0	9	7	0	3	1	7	12	0	3	4	46	0.574468	0.6	0.35	0.775	0.02322	0
584	584	5	0	0	14	5	1	4	1	9	8	0	7	1	50	0.434783	0.444444	0.5	0.694444	0.0775481	0.1
589	589	1	0	0	42	27	1	11	1	16	35	1	5	13	152	0.583893	0.673077	0.307692	0.826923	0.0411697	0.025641
589	589	2	0	0	36	24	0	10	1	15	31	6	8	19	150	0.418919	0.659574	0.319149	0.819149	0.0407553	0
589	589	3	0	0	39	26	2	18	1	10	31	2	7	17	153	0.425	0.738095	0.238095	0.857143	0.0334141	0.0434783
589	589	4	0	0	54	20	1	19	1	5	14	3	9	17	143	0.24031	0.7	0.25	0.825	0.008145	0.025
589	589	5	0	0	44	16	2	17	7	13	40	6	4	12	161	0.460526	0.666667	0.216667	0.775	-0.0555333	0.0571429
595	595	1	0	0	45	24	0	19	45	12	15	18	4	3	185	0.519126	0.208333	0.166667	0.291667	-0.316246	0
595	595	2	0	0	37	17	0	14	32	13	11	12	3	0	139	0.56391	0.196429	0.232143	0.3125	-0.251113	0
595	595	3	0	0	40	21	2	13	30	14	14	14	5	2	155	0.523179	0.241379	0.241379	0.362069	-0.239222	0.0555556
595	595	4	0	0	38	20	2	12	34	12	11	13	3	2	147	0.552448	0.192982	0.210526	0.298246	-0.27278	0.0588235
595	595	5	0	0	32	18	1	10	30	10	10	10	2	1	124	0.603306	0.2	0.2	0.3	-0.28318	0.0344828
642	642	1	0	0	32	20	1	8	19	15	13	13	2	1	124	0.586777	0.276596	0.319149	0.43617	-0.156785	0.0344828
642	642	2	0	0	6	2	0	4	1	3	5	3	1	0	25	0.36	0.555556	0.333333	0.722222	-0.0253074	0
642	642	3	0	0	20	10	1	6	10	15	14	2	3	3	84	0.62963	0.358974	0.384615	0.551282	-0.0715231	0.0588235
642	642	4	0	0	17	11	1	5	8	9	10	3	4	1	69	0.594203	0.37037	0.333333	0.537037	-0.119087	0.0588235
642	642	5	0	1	61	24	4	9	19	24	11	9	10	4	176	0.523179	0.203704	0.444444	0.425926	-0.0386326	0.108108
703	703	1	0	0	46	24	5	17	12	9	11	14	8	11	157	0.299363	0.34375	0.28125	0.484375	-0.179484	0.108696
703	703	2	0	0	47	31	4	22	15	8	21	20	11	20	199	0.263158	0.477273	0.181818	0.568182	-0.224136	0.0701754
703	703	3	0	0	51	28	3	10	17	16	12	18	6	14	175	0.381818	0.266667	0.355556	0.444444	-0.121924	0.0731707
703	703	4	0	0	48	19	3	10	13	7	9	22	7	11	149	0.203008	0.310345	0.241379	0.431034	-0.227949	0.09375
703	703	5	0	0	44	24	1	7	9	13	9	18	8	2	135	0.414634	0.290323	0.419355	0.5	-0.0541443	0.03125
707	707	1	0	0	42	17	3	15	13	7	35	7	2	4	145	0.550725	0.636364	0.127273	0.7	-0.170746	0.0857143
707	707	2	0	0	55	23	0	16	11	14	29	7	3	3	161	0.6	0.537037	0.259259	0.666667	-0.111588	0
707	707	3	0	0	36	13	0	14	12	20	18	6	4	2	125	0.551724	0.36	0.4	0.56	-0.0558136	0
707	707	4	0	0	37	17	0	12	22	17	18	9	3	2	137	0.596899	0.315789	0.298246	0.464912	-0.169821	0
707	707	5	0	0	42	20	1	13	21	18	23	15	5	3	161	0.51634	0.370968	0.290323	0.516129	-0.161897	0.0294118
712	712	1	0	0	11	3	0	7	9	8	13	2	3	4	60	0.457627	0.433333	0.266667	0.566667	-0.160922	0
712	712	2	0	0	10	4	0	4	2	11	15	1	4	3	54	0.538462	0.535714	0.392857	0.732143	0.0211619	0
712	712	3	0	0	16	3	0	4	1	4	21	0	4	4	57	0.5	0.807692	0.153846	0.884615	0.0239481	0
712	712	4	0	0	7	4	0	6	3	4	16	3	0	6	49	0.423077	0.695652	0.173913	0.782609	-0.0720155	0
712	712	5	0	0	12	4	0	9	1	7	24	1	5	2	65	0.484848	0.75	0.21875	0.859375	0.0262312	0
714	714	1	0	0	12	2	0	4	1	9	6	1	2	1	38	0.5	0.375	0.5625	0.65625	0.111658	0
714	714	2	0	0	10	4	0	2	2	6	11	0	1	2	38	0.705882	0.578947	0.315789	0.736842	-0.0265338	0
714	714	3	0	0	15	6	0	4	0	7	11	0	2	1	46	0.658537	0.611111	0.388889	0.805556	0.0706398	0
714	714	4	0	0	12	9	2	1	1	3	11	2	1	2	44	0.636364	0.733333	0.2	0.833333	-0.00947333	0.166667
714	714	5	0	0	6	1	0	2	1	3	7	0	2	2	24	0.428571	0.636364	0.272727	0.772727	-0.0252917	0
716	716	1	0	0	40	16	1	8	2	8	32	2	8	7	124	0.522936	0.761905	0.190476	0.857143	0.0103796	0.04
716	716	2	0	0	48	17	0	14	3	11	15	2	10	2	122	0.466667	0.517241	0.37931	0.706897	-0.00389049	0
716	716	3	0	1	42	21	3	13	1	15	22	2	6	4	130	0.548387	0.578947	0.394737	0.776316	0.0524136	0.0810811
716	716	4	0	0	39	18	1	10	4	22	16	4	7	3	124	0.561404	0.380952	0.52381	0.642857	0.0750544	0.0344828
716	716	5	0	1	35	17	0	12	1	24	15	1	4	3	113	0.622642	0.375	0.6	0.675	0.149158	0
727	727	1	0	0	36	21	4	14	11	17	12	11	8	1	135	0.449275	0.3	0.425	0.5125	-0.046575	0.102564
727	727	2	0	0	40	25	2	15	10	20	14	12	8	2	148	0.48	0.318182	0.454545	0.545455	-0.0129502	0.047619
727	727	3	0	0	34	24	0	11	15	11	13	6	3	1	118	0.647059	0.333333	0.282051	0.474359	-0.181582	0
727	727	4	0	0	33	17	2	8	5	24	19	0	6	2	116	0.672727	0.395833	0.5	0.645833	0.0567467	0.0740741
727	727	5	0	0	52	9	3	16	9	16	19	6	10	3	143	0.361345	0.431818	0.363636	0.613636	-0.0646349	0.107143
732	732	1	0	0	45	20	5	8	8	24	21	9	3	10	153	0.503546	0.396226	0.45283	0.622642	0.00972777	0.151515
732	732	2	0	0	47	15	3	12	12	16	15	11	4	5	140	0.430894	0.348837	0.372093	0.534884	-0.0871526	0.1
732	732	3	0	0	36	15	5	8	11	22	21	10	9	4	141	0.458647	0.388889	0.407407	0.592593	-0.0384639	0.178571
732	732	4	0	0	43	30	2	5	5	37	25	5	8	3	163	0.707006	0.373134	0.552239	0.649254	0.100756	0.0540541
732	732	5	0	0	27	8	3	5	12	9	4	6	7	1	82	0.380282	0.16	0.36	0.34	-0.12269	0.1875
737	737	1	0	0	91	49	8	35	2	23	52	8	28	46	342	0.271137	0.675325	0.298701	0.824675	0.0341873	0.0869565
737	737	2	0	0	87	49	6	35	25	35	45	24	20	34	360	0.344353	0.428571	0.333333	0.595238	-0.0963871	0.0666667
737	737	3	0	0	89	48	7	29	5	22	59	4	17	27	307	0.443709	0.686047	0.255814	0.813953	0.00100856	0.0833333
737	737	4	0	0	49	33	0	14	5	13	25	2	10	21	172	0.447059	0.581395	0.302326	0.732558	-0.0382321	0
737	737	5	0	0	44	23	0	18	7	13	22	5	14	26	172	0.254438	0.52381	0.309524	0.678571	-0.0696578	0
738	738	1	0	0	44	21	4	17	15	24	26	8	12	5	176	0.471264	0.4	0.369231	0.584615	-0.0724092	0.0952381
738	738	2	0	0	43	16	4	18	10	30	21	5	10	4	161	0.474359	0.344262	0.491803	0.590164	0.0312171	0.105263
738	738	3	0	0	43	24	3	23	5	27	29	7	8	6	175	0.483516	0.47541	0.442623	0.696721	0.03568	0.06
738	738	4	0	0	44	17	1	19	1	28	30	7	8	6	161	0.467532	0.508475	0.474576	0.745763	0.086134	0.027027
738	738	5	0	0	40	20	6	16	13	26	25	10	9	3	168	0.482353	0.390625	0.40625	0.59375	-0.0389751	0.142857
748	748	1	0	0	8	7	1	0	3	11	2	0	0	0	32	0.9375	0.125	0.6875	0.46875	0.207645	0.125
748	748	1	0	0	24	9	1	11	17	18	8	9	4	3	104	0.445545	0.186047	0.418605	0.395349	-0.0647374	0.047619
748	748	2	0	0	2	0	0	4	0	3	0	2	1	1	13	-0.0666667	0	1	0.5	0.5486	0
748	748	2	0	0	19	9	0	9	15	15	5	7	5	2	86	0.458824	0.142857	0.428571	0.357143	-0.0530102	0
748	748	3	0	0	2	2	0	2	1	2	1	2	2	1	15	0.176471	0.25	0.5	0.5	0.0203312	0
748	748	3	0	0	22	9	0	10	16	16	9	8	7	2	99	0.4375	0.219512	0.390244	0.414634	-0.0921111	0
748	748	4	0	0	6	0	2	6	1	4	2	5	2	2	30	-0.0625	0.285714	0.571429	0.571429	0.0970735	0.25
748	748	4	0	0	21	10	1	11	16	18	5	11	2	4	99	0.42	0.128205	0.461538	0.358974	-0.0186692	0.0454545
748	748	5	0	0	6	2	0	5	2	4	3	2	0	0	24	0.44	0.333333	0.444444	0.555556	-0.0191889	0
748	748	5	0	0	25	13	2	13	20	19	10	12	5	4	123	0.428571	0.204082	0.387755	0.397959	-0.09531	0.0714286
750	750	1	0	0	39	14	0	10	5	26	21	4	5	4	128	0.59292	0.403846	0.5	0.653846	0.0598774	0
750	750	2	0	0	43	11	1	12	7	30	22	5	6	4	141	0.540984	0.372881	0.508475	0.627119	0.0569052	0.0416667
750	750	3	0	0	45	14	1	14	10	32	25	7	6	5	159	0.538462	0.373134	0.477612	0.61194	0.026129	0.0344828
750	750	4	0	0	37	16	3	10	6	25	20	4	4	3	128	0.6	0.392157	0.490196	0.637255	0.0455458	0.103448
750	750	5	0	0	34	10	0	7	6	25	18	3	5	5	113	0.583333	0.367347	0.510204	0.622449	0.0567739	0
761	761	1	0	0	48	16	5	10	5	19	26	5	8	7	149	0.469697	0.52	0.38	0.71	-0.0015224	0.16129
761	761	2	0	0	24	25	5	7	6	19	14	4	3	6	113	0.603175	0.358974	0.487179	0.602564	0.031041	0.135135
761	761	3	0	0	47	16	3	13	6	20	19	3	12	7	146	0.419847	0.422222	0.444444	0.644444	0.0119459	0.09375
761	761	4	0	0	48	17	1	5	6	21	38	9	4	4	153	0.640625	0.584615	0.323077	0.746154	-0.0151415	0.0434783
761	761	5	0	0	1	2	0	1	0	1	3	0	1	0	9	0.636364	0.75	0.25	0.875	0.0574812	0
771	771	1	0	0	31	23	2	12	15	21	12	4	8	0	128	0.61194	0.25	0.4375	0.46875	-0.0421688	0.0540541
771	771	2	0	0	38	19	0	13	11	4	11	11	1	5	113	0.439252	0.423077	0.153846	0.5	-0.278283	0
771	771	3	0	0	38	13	2	12	2	16	14	6	6	7	116	0.371429	0.4375	0.5	0.6875	0.0743113	0.0740741
771	771	4	0	0	36	9	3	8	13	14	4	8	4	4	103	0.37931	0.129032	0.451613	0.354839	-0.0286828	0.15
771	771	5	0	0	30	16	3	17	6	20	19	5	5	5	126	0.469697	0.422222	0.444444	0.644444	0.0119459	0.0833333
774	774	1	0	0	38	17	0	17	10	21	25	5	6	3	142	0.550725	0.446429	0.375	0.633929	-0.0465108	0
774	774	2	0	0	45	20	0	18	8	30	29	4	10	7	171	0.52439	0.432836	0.447761	0.656716	0.0199482	0
774	774	3	0	0	49	19	2	23	12	35	32	10	9	8	199	0.463918	0.405063	0.443038	0.626582	0.00340122	0.0454545
774	774	4	0	0	42	20	1	19	13	28	30	9	6	10	178	0.488636	0.422535	0.394366	0.619718	-0.0379971	0.025
774	774	5	1	0	43	21	2	16	9	26	26	8	8	5	164	0.506173	0.42623	0.42623	0.639344	-0.00452421	0.05
776	776	1	0	0	26	19	3	15	6	16	25	5	8	5	128	0.482014	0.531915	0.340426	0.702128	-0.0336872	0.0810811
776	776	2	0	0	23	16	3	13	5	14	27	4	6	5	116	0.504	0.586957	0.304348	0.73913	-0.032158	0.09375
776	776	3	0	0	30	22	4	16	9	13	32	5	4	6	141	0.542484	0.592593	0.240741	0.712963	-0.0916008	0.0952381
776	776	4	0	0	21	15	2	10	4	12	22	4	3	4	97	0.553398	0.578947	0.315789	0.736842	-0.0265338	0.0740741
776	776	5	0	0	26	10	1	12	8	17	25	4	8	4	115	0.482143	0.5	0.34	0.67	-0.053375	0.0434783
786	786	1	0	0	44	13	3	11	10	8	14	7	4	0	114	0.484536	0.4375	0.25	0.5625	-0.175689	0.111111
786	786	2	0	0	42	13	0	12	4	13	18	5	2	4	113	0.520833	0.514286	0.371429	0.7	-0.0135551	0
786	786	3	0	0	34	16	0	10	2	6	14	4	3	4	93	0.505882	0.636364	0.272727	0.772727	-0.0252917	0
786	786	4	0	0	33	9	0	8	3	14	19	2	7	9	104	0.409091	0.527778	0.388889	0.722222	0.0121738	0
786	786	5	0	0	39	9	4	10	2	16	23	2	5	5	115	0.474747	0.560976	0.390244	0.756098	0.0352948	0.173913
787	787	1	0	0	24	10	1	9	11	5	10	3	2	1	76	0.555556	0.384615	0.192308	0.480769	-0.255131	0.05
787	787	2	0	0	23	7	0	7	14	7	8	3	1	1	71	0.612903	0.275862	0.241379	0.396552	-0.234675	0
787	787	3	0	0	29	12	1	9	8	7	21	2	1	2	92	0.647059	0.583333	0.194444	0.680556	-0.144708	0.0454545
787	787	4	0	0	26	13	0	8	3	5	14	2	0	2	73	0.647059	0.636364	0.227273	0.75	-0.0707463	0
787	787	5	0	0	23	5	1	5	10	6	10	2	2	3	67	0.527273	0.384615	0.230769	0.5	-0.216669	0.0909091
790	790	1	0	0	37	23	0	0	6	16	30	7	3	6	128	0.719298	0.576923	0.307692	0.730769	-0.0360827	0
790	790	2	0	0	54	21	0	7	4	12	27	3	5	0	133	0.719626	0.627907	0.27907	0.767442	-0.0258541	0
790	790	3	0	0	38	23	1	10	4	19	28	5	10	6	144	0.542857	0.54902	0.372549	0.735294	0.00952826	0.0294118
790	790	4	0	0	48	22	3	66	3	12	24	6	9	5	198	0.261411	0.615385	0.307692	0.769231	-0.00721538	0.032967
790	790	5	0	0	43	26	1	11	2	14	32	4	8	9	150	0.544828	0.666667	0.291667	0.8125	0.0194667	0.0263158
796	796	1	0	0	51	11	0	20	1	29	18	4	20	7	161	0.276596	0.375	0.604167	0.677083	0.153324	0
796	796	2	0	0	42	18	1	11	1	24	24	3	16	10	150	0.405797	0.489796	0.489796	0.734694	0.0906561	0.0333333
796	796	3	0	0	38	13	1	11	2	24	24	2	12	3	130	0.504274	0.48	0.48	0.72	0.0755056	0.04
796	796	4	0	0	44	18	0	13	2	18	21	2	7	3	128	0.565217	0.512195	0.439024	0.731707	0.0527894	0
796	796	5	0	0	36	19	0	13	3	20	26	1	6	10	134	0.538462	0.530612	0.408163	0.734694	0.0332277	0
802	802	1	0	0	32	16	0	7	3	3	23	0	0	6	90	0.679012	0.793103	0.103448	0.844828	-0.0428612	0
802	802	2	0	0	22	11	1	5	4	9	17	2	0	3	74	0.681159	0.566667	0.3	0.716667	-0.051015	0.0588235
802	802	3	0	0	29	14	0	8	1	8	19	1	3	1	84	0.662338	0.678571	0.285714	0.821429	0.024118	0
802	802	4	0	0	23	11	0	5	0	10	21	1	3	2	76	0.681159	0.677419	0.322581	0.83871	0.0599468	0
802	802	5	0	0	26	10	0	6	2	12	23	0	2	2	83	0.726027	0.621622	0.324324	0.783784	0.0143533	0
804	804	1	0	0	27	11	0	2	10	7	17	4	2	1	81	0.731343	0.5	0.205882	0.602941	-0.187493	0
804	804	2	0	0	35	18	1	5	6	11	23	2	2	3	106	0.726316	0.575	0.275	0.7125	-0.0701472	0.0416667
804	804	3	0	0	30	12	1	2	7	7	18	3	2	2	85	0.710145	0.5625	0.21875	0.671875	-0.135151	0.0666667
804	804	4	0	0	47	11	2	3	6	15	19	2	4	1	110	0.696203	0.475	0.375	0.6625	-0.0321597	0.125
804	804	5	0	0	29	8	0	2	9	8	14	4	1	1	76	0.719298	0.451613	0.258065	0.580645	-0.160953	0
808	808	1	0	0	51	17	2	16	17	16	5	19	22	1	166	0.2	0.131579	0.421053	0.342105	-0.0595063	0.0571429
808	808	2	0	0	51	15	1	17	17	17	5	17	12	0	152	0.298507	0.128205	0.435897	0.346154	-0.0443103	0.030303
808	808	3	0	0	45	18	6	14	13	12	11	20	26	1	166	0.157233	0.305556	0.333333	0.472222	-0.137059	0.157895
808	808	4	0	0	47	21	5	15	17	39	13	14	16	2	189	0.431694	0.188406	0.565217	0.471014	0.0818777	0.121951
808	808	5	0	0	52	18	3	10	16	40	6	14	10	4	173	0.460526	0.0967742	0.645161	0.419355	0.169228	0.0967742
810	810	1	0	0	37	19	5	15	6	43	11	8	10	1	155	0.503185	0.183333	0.716667	0.541667	0.233335	0.128205
810	810	2	0	0	41	18	4	14	10	33	7	6	4	0	137	0.575758	0.14	0.66	0.47	0.178655	0.111111
810	810	3	0	0	47	34	5	5	30	6	23	22	4	0	176	0.583815	0.389831	0.101695	0.440678	-0.343827	0.113636
810	810	4	0	0	44	40	2	0	9	52	13	6	3	0	169	0.868263	0.175676	0.702703	0.527027	0.219471	0.047619
810	810	5	0	0	40	22	2	9	15	33	14	3	4	0	142	0.733333	0.225806	0.532258	0.491935	0.0503181	0.0606061
812	812	1	0	0	13	13	3	3	2	9	10	1	2	0	56	0.709677	0.47619	0.428571	0.690476	0.0220422	0.157895
812	812	2	0	0	34	11	1	4	1	5	9	2	4	0	71	0.584906	0.6	0.333333	0.766667	0.00655333	0.0625
812	812	3	0	0	21	11	1	4	6	9	10	1	1	0	64	0.762712	0.4	0.36	0.58	-0.08164	0.0625
812	812	4	0	0	20	10	0	5	1	9	22	1	3	0	71	0.727273	0.6875	0.28125	0.828125	0.027777	0
812	812	5	0	0	17	10	0	11	3	3	16	1	3	4	68	0.472222	0.727273	0.136364	0.795455	-0.0791488	0
818	818	1	0	0	38	10	1	5	10	20	23	5	3	0	115	0.698925	0.433962	0.377358	0.622642	-0.0499451	0.0625
818	818	2	0	0	27	13	1	5	7	11	8	2	2	1	77	0.681159	0.307692	0.423077	0.519231	-0.0468462	0.0526316
818	818	3	0	0	43	10	5	8	13	12	27	5	3	1	127	0.588785	0.519231	0.230769	0.634615	-0.151223	0.217391
818	818	4	0	0	11	4	0	2	9	6	10	3	1	0	46	0.707317	0.4	0.24	0.52	-0.20164	0
818	818	5	0	0	34	9	4	4	20	12	15	4	1	0	103	0.697674	0.319149	0.255319	0.446809	-0.211943	0.235294
819	819	1	0	0	43	19	0	9	6	20	19	5	7	7	135	0.533333	0.422222	0.444444	0.644444	0.0119459	0
819	819	2	0	0	40	20	1	10	7	22	27	4	12	13	156	0.455782	0.482143	0.392857	0.678571	-0.010481	0.0322581
819	819	3	0	0	57	19	2	12	11	19	19	5	14	5	163	0.453237	0.387755	0.387755	0.581633	-0.0585352	0.0606061
819	819	4	0	0	47	15	2	16	10	12	25	12	5	10	154	0.357143	0.531915	0.255319	0.659574	-0.118794	0.0606061
820	820	1	0	0	48	20	2	10	15	18	3	12	9	9	146	0.353846	0.0833333	0.5	0.333333	0.0264479	0.0625
820	820	2	0	0	61	19	0	12	20	21	16	11	7	4	171	0.51773	0.280702	0.368421	0.464912	-0.106821	0
820	820	3	0	0	48	23	3	9	20	30	10	14	3	4	164	0.562914	0.166667	0.5	0.416667	0.017025	0.0857143
820	820	4	0	0	33	15	3	7	16	24	21	15	3	5	142	0.507463	0.344262	0.393443	0.540984	-0.0671435	0.12
820	820	5	0	0	42	15	0	16	11	14	13	12	7	1	131	0.4	0.342105	0.368421	0.526316	-0.0927839	0
821	821	1	0	0	56	18	3	25	0	26	35	2	6	13	184	0.436782	0.57377	0.42623	0.786885	0.0802086	0.0652174
821	821	2	0	0	43	24	1	19	0	18	43	4	10	14	176	0.457627	0.704918	0.295082	0.852459	0.0578765	0.0227273
821	821	3	0	0	54	24	4	21	0	32	26	6	11	16	194	0.386243	0.448276	0.551724	0.724138	0.131096	0.0816327
821	821	4	0	0	46	26	7	15	1	11	48	8	10	17	189	0.403141	0.8	0.183333	0.891667	0.0447333	0.145833
821	821	5	0	0	39	27	3	20	0	17	48	8	6	17	185	0.44898	0.738462	0.261538	0.869231	0.0572277	0.06
822	822	1	0	0	27	14	0	4	7	15	9	7	6	5	94	0.482353	0.290323	0.483871	0.532258	0.0103718	0
822	822	2	0	0	26	17	1	6	10	13	18	5	7	1	104	0.607843	0.439024	0.317073	0.597561	-0.107913	0.0416667
822	822	3	0	0	33	8	0	4	3	22	11	7	8	5	101	0.4	0.305556	0.611111	0.611111	0.140718	0
822	822	4	0	0	40	12	1	6	4	19	10	7	9	7	115	0.361702	0.30303	0.575758	0.590909	0.10482	0.0526316
832	832	1	0	0	34	16	2	8	15	28	17	12	9	7	148	0.457143	0.283333	0.466667	0.516667	-0.00811542	0.0769231
832	832	2	0	0	31	13	8	5	18	28	11	10	10	1	135	0.476923	0.192982	0.491228	0.438596	0.00792198	0.307692
832	832	3	0	0	21	16	0	6	10	30	20	3	4	1	111	0.75	0.333333	0.5	0.583333	0.0363667	0
832	832	4	0	0	21	15	0	8	9	16	23	5	3	3	103	0.638095	0.479167	0.333333	0.645833	-0.0716085	0
832	832	5	0	0	47	23	3	11	20	23	15	8	2	0	152	0.661972	0.258621	0.396552	0.456897	-0.0820485	0.0810811
843	843	1	0	0	41	12	7	11	24	20	10	6	6	3	140	0.488372	0.185185	0.37037	0.37037	-0.11297	0.233333
843	843	2	0	0	42	15	1	14	8	23	21	5	8	6	143	0.480916	0.403846	0.442308	0.625	0.0021851	0.0333333
843	843	3	0	0	39	17	5	14	26	7	16	6	4	3	137	0.522388	0.326531	0.142857	0.397959	-0.322562	0.138889
843	843	4	0	0	33	14	3	17	31	15	21	10	6	4	154	0.483871	0.313433	0.223881	0.425373	-0.244739	0.0882353
843	843	5	0	0	54	14	4	14	7	15	13	6	15	5	147	0.296	0.371429	0.428571	0.585714	-0.0234918	0.125
849	849	1	1	0	35	20	3	12	14	14	12	10	9	5	134	0.411765	0.3	0.35	0.475	-0.121575	0.0833333
849	849	2	0	0	45	14	2	15	42	3	8	20	1	4	154	0.4	0.150943	0.0566038	0.179245	-0.425568	0.0645161
849	849	3	0	0	41	11	2	14	12	21	10	5	3	2	121	0.514019	0.232558	0.488372	0.476744	0.00695803	0.0740741
849	849	4	0	1	43	15	5	15	25	6	12	18	10	2	152	0.300699	0.27907	0.139535	0.348837	-0.335986	0.142857
849	849	5	0	0	34	17	2	16	14	19	9	8	6	2	127	0.46875	0.214286	0.452381	0.440476	-0.0302634	0.0571429
850	850	1	0	0	56	11	3	8	8	12	25	12	7	13	155	0.289256	0.555556	0.266667	0.688889	-0.0919741	0.136364
850	850	2	0	0	65	26	3	16	7	8	19	9	11	14	178	0.329114	0.558824	0.235294	0.676471	-0.121127	0.0666667
850	850	3	0	0	54	23	0	27	5	4	14	11	15	22	175	0.122807	0.608696	0.173913	0.695652	-0.14621	0
850	850	4	0	0	51	21	4	18	12	9	22	7	10	11	165	0.363057	0.511628	0.209302	0.616279	-0.177271	0.0930233
850	850	5	0	0	41	23	3	21	5	16	28	9	18	11	175	0.314917	0.571429	0.326531	0.734694	-0.0211469	0.0638298
853	853	1	0	1	46	29	3	15	26	16	8	17	6	2	169	0.491124	0.16	0.32	0.32	-0.16269	0.0638298
853	853	2	0	0	51	18	2	19	41	2	8	29	1	6	177	0.309091	0.156863	0.0392157	0.176471	-0.443311	0.0512821
853	853	3	0	0	53	24	6	14	30	35	15	13	15	4	209	0.48	0.1875	0.4375	0.40625	-0.0458418	0.136364
853	853	4	0	0	50	17	5	19	44	8	15	28	0	4	190	0.381215	0.223881	0.119403	0.283582	-0.362672	0.121951
853	853	5	0	0	71	23	1	12	16	13	10	13	8	3	170	0.451852	0.25641	0.333333	0.423077	-0.145554	0.0277778
855	855	1	0	0	49	15	2	11	3	13	33	1	7	15	149	0.4375	0.673469	0.265306	0.806122	-0.000866431	0.0714286
855	855	2	0	0	44	20	1	16	1	8	26	3	7	18	144	0.343066	0.742857	0.228571	0.857143	0.0287241	0.027027
855	855	3	0	1	52	11	1	11	0	13	27	1	5	13	135	0.409524	0.675	0.325	0.8375	0.0601953	0.0434783
855	855	4	0	0	56	16	3	9	2	18	35	4	11	15	169	0.404255	0.636364	0.327273	0.8	0.0292537	0.107143
855	855	5	0	0	46	15	3	7	1	16	32	1	6	13	140	0.495798	0.653061	0.326531	0.816327	0.0425302	0.12
859	859	1	0	0	39	30	2	3	7	16	30	2	0	0	129	0.888	0.566038	0.301887	0.716981	-0.0495659	0.0571429
859	859	2	1	0	61	25	3	14	3	21	31	3	8	11	180	0.509202	0.563636	0.381818	0.754545	0.028701	0.0697674
859	859	3	0	0	69	30	5	17	3	18	26	3	11	9	191	0.482759	0.553191	0.382979	0.744681	0.0227447	0.0961538
859	859	4	0	1	51	32	1	17	5	23	32	6	13	12	193	0.486911	0.533333	0.383333	0.725	0.01012	0.02
859	859	5	0	0	61	20	7	14	13	10	29	10	1	5	170	0.506667	0.557692	0.192308	0.653846	-0.164884	0.170732
861	861	1	0	0	38	19	2	15	4	2	47	4	2	7	140	0.565217	0.886792	0.0377358	0.90566	0.00361185	0.0555556
861	861	2	0	0	44	23	0	19	4	5	59	2	2	6	164	0.641975	0.867647	0.0735294	0.904412	0.0151723	0
861	861	3	0	0	25	21	0	20	3	8	48	3	3	7	138	0.571429	0.813559	0.135593	0.881356	0.0124051	0
861	861	4	0	0	31	27	0	16	14	10	58	7	2	6	171	0.661202	0.707317	0.121951	0.768293	-0.11297	0
861	861	5	0	0	64	28	2	21	14	3	47	9	1	4	193	0.588889	0.734375	0.046875	0.757812	-0.161554	0.0392157
894	894	1	0	0	31	30	8	3	9	18	9	15	3	2	128	0.550725	0.25	0.5	0.5	0.0203312	0.195122
894	894	2	0	0	38	18	4	6	12	13	23	16	6	1	137	0.480315	0.479167	0.270833	0.614583	-0.134108	0.142857
894	894	3	0	0	40	27	5	3	6	16	26	8	2	4	137	0.666667	0.541667	0.333333	0.708333	-0.0345214	0.142857
894	894	4	0	0	49	41	8	2	10	16	23	9	4	7	169	0.649123	0.469388	0.326531	0.632653	-0.0835661	0.156863
894	894	5	0	0	39	22	3	7	7	16	24	8	6	4	136	0.565891	0.510638	0.340426	0.680851	-0.0467362	0.09375
900	900	1	0	0	46	16	6	26	35	31	3	16	12	0	191	0.378238	0.0434783	0.449275	0.268116	-0.0152704	0.125
900	900	2	0	0	39	20	4	9	34	24	6	16	3	0	155	0.57047	0.09375	0.375	0.28125	-0.100426	0.121212
900	900	3	0	0	44	28	2	18	27	18	4	11	2	1	155	0.572327	0.0816327	0.367347	0.265306	-0.10588	0.0416667
900	900	4	0	0	50	19	5	11	41	11	5	14	5	2	163	0.5	0.0877193	0.192982	0.184211	-0.281383	0.142857
900	900	5	0	0	51	25	3	7	44	18	4	16	4	0	172	0.615385	0.0606061	0.272727	0.19697	-0.196046	0.0857143
907	907	1	0	0	56	28	2	10	6	33	23	3	3	2	166	0.733333	0.370968	0.532258	0.637097	0.0800389	0.05
907	907	2	0	0	40	31	3	11	6	38	30	3	6	3	171	0.704545	0.405405	0.513514	0.662162	0.0740138	0.0666667
907	907	3	0	0	56	22	3	7	10	27	26	5	11	6	173	0.57047	0.412698	0.428571	0.626984	-0.00795571	0.09375
907	907	4	0	0	60	24	4	14	7	18	29	9	8	2	175	0.528662	0.537037	0.333333	0.703704	-0.0375141	0.0952381
907	907	5	0	0	46	24	1	19	15	29	30	13	5	10	192	0.494737	0.405405	0.391892	0.601351	-0.0476078	0.0227273
913	913	1	0	0	37	26	3	22	24	15	24	14	7	11	183	0.42132	0.380952	0.238095	0.5	-0.21066	0.0588235
913	913	2	0	0	30	25	4	11	6	11	31	5	8	11	142	0.486842	0.645833	0.229167	0.760417	-0.0609647	0.1
913	913	3	0	0	39	18	0	8	4	7	27	4	6	11	124	0.477477	0.710526	0.184211	0.802632	-0.0476387	0
913	913	4	0	0	46	30	3	12	9	9	22	6	6	9	152	0.523179	0.55	0.225	0.6625	-0.137369	0.0666667
913	913	5	0	0	31	14	1	7	9	9	22	6	7	7	113	0.461538	0.55	0.225	0.6625	-0.137369	0.0454545
105	105r1	1	0	0	28	10	0	7	1	9	14	1	3	0	73	0.645161	0.583333	0.375	0.770833	0.0358479	0
105	105r1	2	0	0	21	7	1	10	0	10	16	1	0	7	73	0.457143	0.615385	0.384615	0.807692	0.0697077	0.0555556
105	105r1	3	0	0	20	9	2	7	1	8	18	1	8	3	77	0.44	0.666667	0.296296	0.814815	0.0240963	0.111111
105	105r1	4	1	0	24	16	2	5	3	13	12	1	2	2	80	0.679012	0.428571	0.464286	0.660714	0.0345653	0.0833333
105	105r1	5	0	0	18	13	0	8	2	5	18	0	3	2	69	0.638889	0.72	0.2	0.82	-0.0226704	0
105	105r2	1	0	0	33	7	3	18	8	3	13	5	12	4	106	0.168317	0.541667	0.125	0.604167	-0.242855	0.107143
105	105r2	2	0	0	28	19	0	12	0	22	26	0	7	7	121	0.580645	0.541667	0.458333	0.770833	0.0904786	0
105	105r2	3	0	0	25	11	5	10	9	11	10	5	7	18	111	0.196429	0.333333	0.366667	0.516667	-0.0969667	0.192308
105	105r2	4	0	0	37	12	1	28	6	9	11	7	17	11	139	0.104895	0.423077	0.346154	0.596154	-0.085975	0.0243902
105	105r2	5	0	0	22	19	0	10	1	24	25	1	12	6	120	0.543307	0.5	0.48	0.74	0.086625	0
129	129r1	1	1	0	27	7	2	7	9	15	10	6	4	0	87	0.487179	0.294118	0.441176	0.514706	-0.0315886	0.117647
129	129r1	2	0	0	30	8	3	6	10	14	10	6	8	2	97	0.404762	0.294118	0.411765	0.5	-0.0610003	0.176471
129	129r1	3	0	0	35	10	4	8	12	17	11	5	6	3	111	0.469388	0.275	0.425	0.4875	-0.0511947	0.181818
129	129r2	1	0	0	15	17	1	7	13	5	6	9	2	3	78	0.5	0.25	0.208333	0.354167	-0.271335	0.04
129	129r2	2	0	0	29	15	1	7	10	16	14	5	3	0	100	0.659574	0.35	0.4	0.55	-0.0588988	0.0434783
129	129r2	3	0	0	4	6	0	4	1	2	6	1	2	0	26	0.5625	0.666667	0.222222	0.777778	-0.0499778	0
129	129r2	4	0	0	22	10	1	6	14	8	6	7	4	2	80	0.466667	0.214286	0.285714	0.357143	-0.19693	0.0588235
149	149r1	1	0	0	19	13	1	7	1	13	7	1	3	3	68	0.571429	0.333333	0.619048	0.642857	0.155414	0.047619
149	149r1	2	0	0	15	7	0	2	1	8	16	2	2	5	58	0.576923	0.64	0.32	0.8	0.0249904	0
149	149r1	3	0	0	28	16	1	8	4	10	13	4	3	2	89	0.581395	0.481481	0.37037	0.666667	-0.0333255	0.04
149	149r1	4	0	0	16	4	0	3	1	7	9	0	4	3	47	0.473684	0.529412	0.411765	0.735294	0.0360737	0
149	149r1	5	0	0	16	12	3	4	0	8	12	1	2	4	62	0.569231	0.6	0.4	0.8	0.07322	0.157895
149	149r2	1	0	0	9	7	0	2	1	9	4	1	2	2	37	0.621622	0.285714	0.642857	0.607143	0.168502	0
149	149r2	2	0	0	11	6	0	2	2	3	2	0	2	1	29	0.615385	0.285714	0.428571	0.5	-0.0457837	0
149	149r2	3	0	0	3	2	0	0	2	4	2	0	2	1	16	0.6	0.25	0.5	0.5	0.0203312	0
149	149r2	4	0	0	14	4	0	2	2	9	5	1	2	1	40	0.625	0.3125	0.5625	0.59375	0.0936645	0
149	149r2	5	0	0	20	7	0	4	2	3	5	1	1	1	44	0.6	0.5	0.3	0.65	-0.093375	0
161	161r1	1	0	0	34	23	2	12	11	16	30	9	2	2	141	0.625	0.526316	0.280702	0.666667	-0.0969254	0.0540541
161	161r1	2	0	0	48	9	0	7	14	11	15	10	3	5	122	0.444444	0.375	0.275	0.5125	-0.175842	0
161	161r1	3	0	0	37	25	3	16	16	25	10	11	5	4	152	0.509434	0.196078	0.490196	0.441176	0.00693449	0.0681818
161	161r1	4	0	0	28	17	2	16	2	17	19	5	11	6	123	0.384615	0.5	0.447368	0.723684	0.0539934	0.0571429
161	161r2	1	0	0	57	24	2	22	7	23	30	5	10	3	183	0.517241	0.5	0.383333	0.691667	-0.0100417	0.0416667
161	161r2	2	0	0	55	17	6	22	12	24	12	24	11	5	188	0.235955	0.25	0.5	0.5	0.0203312	0.133333
161	161r2	3	0	0	32	18	3	17	5	43	6	4	9	2	139	0.517241	0.111111	0.796296	0.509259	0.318189	0.0789474
161	161r2	4	0	0	50	11	3	20	2	32	7	4	26	7	162	0.178082	0.170732	0.780488	0.560976	0.297379	0.0882353
161	161r2	5	0	0	42	18	7	23	0	45	10	5	20	3	173	0.351955	0.181818	0.818182	0.590909	0.334861	0.145833
237	237r1	1	0	0	31	12	1	7	3	2	22	5	4	10	97	0.372093	0.814815	0.0740741	0.851852	-0.04767	0.05
237	237r1	2	0	0	41	15	1	7	5	5	21	2	3	12	112	0.468085	0.677419	0.16129	0.758065	-0.101343	0.0434783
237	237r1	3	0	1	23	20	1	5	4	1	18	1	1	5	80	0.682927	0.782609	0.0434783	0.804348	-0.114396	0.0384615
237	237r1	4	0	1	28	12	3	8	4	5	39	2	1	12	115	0.522936	0.8125	0.104167	0.864583	-0.0202376	0.130435
237	237r2	1	0	0	52	22	8	20	0	16	18	10	12	10	168	0.277108	0.529412	0.470588	0.764706	0.0948972	0.16
237	237r2	2	0	0	52	29	1	13	5	16	54	1	10	19	200	0.539267	0.72	0.213333	0.826667	-0.00933707	0.0232558
237	237r2	3	0	0	51	21	2	19	0	33	31	3	9	11	180	0.48538	0.484375	0.515625	0.742188	0.1135	0.047619
237	237r2	4	0	0	56	20	2	17	1	16	36	1	6	12	167	0.493333	0.679245	0.301887	0.830189	0.0408985	0.0512821
237	237r2	5	0	0	49	21	3	21	1	22	46	3	8	17	191	0.44385	0.666667	0.318841	0.826087	0.0466406	0.0666667
272	272r2	1	0	0	57	37	1	10	4	32	46	1	0	0	188	0.865922	0.560976	0.390244	0.756098	0.0352948	0.0208333
272	272r2	2	0	1	65	27	2	15	5	31	52	3	7	8	216	0.639175	0.590909	0.352273	0.767045	0.0186812	0.0454545
272	272r2	3	0	0	45	20	2	18	5	41	38	5	10	14	198	0.492228	0.452381	0.488095	0.696429	0.0694509	0.05
272	272r2	4	0	0	50	23	5	14	2	28	36	2	8	7	175	0.568862	0.545455	0.424242	0.757576	0.0588656	0.119048
272	272r2	5	0	0	39	20	0	18	2	10	17	1	14	21	142	0.234043	0.586207	0.344828	0.758621	0.00777229	0
280	280r4	1	0	0	41	13	1	15	7	25	15	5	19	3	144	0.348485	0.319149	0.531915	0.585106	0.0646532	0.0344828
280	280r4	2	0	0	39	14	4	16	6	22	20	11	9	3	144	0.381295	0.416667	0.458333	0.645833	0.0234646	0.117647
280	280r4	3	0	0	45	1	1	12	7	20	24	7	9	3	129	0.346939	0.470588	0.392157	0.666667	-0.0173165	0.0714286
280	280r4	4	0	0	41	18	2	12	9	14	30	3	5	6	140	0.572519	0.566038	0.264151	0.698113	-0.0873017	0.0625
280	280r4	5	0	0	30	14	0	11	11	19	16	12	5	5	123	0.440678	0.347826	0.413043	0.554348	-0.0465017	0
287	287r2	1	0	0	8	5	0	6	1	1	5	5	0	0	31	0.352941	0.714286	0.142857	0.785714	-0.0853694	0
287	287r2	2	0	0	0	4	1	3	1	5	1	0	0	0	15	0.652174	0.142857	0.714286	0.5	0.232704	0.125
287	287r2	3	0	0	6	2	0	5	1	2	6	2	1	0	25	0.384615	0.666667	0.222222	0.777778	-0.0499778	0
287	287r2	4	0	0	3	4	0	4	4	6	6	2	3	0	32	0.513514	0.375	0.375	0.5625	-0.0758422	0
287	287r2	5	0	0	9	11	0	4	1	6	10	1	1	1	44	0.72	0.588235	0.352941	0.764706	0.0173751	0
318	318r1	1	0	0	41	17	1	25	2	9	28	2	8	19	152	0.285714	0.717949	0.230769	0.833333	0.00609744	0.0232558
318	318r1	2	0	0	40	14	1	24	1	20	34	1	15	12	162	0.341615	0.618182	0.363636	0.8	0.0509339	0.025641
318	318r1	3	0	0	38	16	2	22	2	10	30	0	9	16	145	0.333333	0.714286	0.238095	0.833333	0.00986871	0.05
318	318r1	4	0	0	30	11	3	15	0	20	15	1	16	10	121	0.25	0.428571	0.571429	0.714286	0.141708	0.103448
318	318r1	5	0	0	31	15	2	20	1	14	16	1	8	8	116	0.360656	0.516129	0.451613	0.741935	0.0677392	0.0540541
318	318r2	1	0	0	41	24	1	18	1	10	27	3	7	20	152	0.363636	0.710526	0.263158	0.842105	0.0313087	0.0232558
318	318r2	2	0	0	40	21	1	17	0	20	34	2	15	12	162	0.416149	0.62963	0.37037	0.814815	0.0668424	0.025641
319	319r1	1	0	0	42	13	5	14	9	18	19	13	4	4	141	0.389313	0.413043	0.391304	0.608696	-0.0450797	0.15625
319	319r1	2	0	0	55	21	1	10	12	11	26	6	3	0	145	0.672131	0.530612	0.22449	0.642857	-0.150446	0.03125
319	319r1	3	0	0	36	22	6	5	22	8	6	6	3	2	116	0.610619	0.166667	0.222222	0.277778	-0.260753	0.181818
319	319r1	4	0	0	39	18	4	12	18	17	20	3	4	6	141	0.573529	0.363636	0.309091	0.518182	-0.145555	0.117647
319	319r1	5	0	0	38	17	3	8	19	14	21	7	2	2	131	0.636364	0.388889	0.259259	0.518519	-0.186612	0.107143
319	319r2	1	0	0	47	32	6	14	11	34	35	5	3	2	189	0.690722	0.4375	0.425	0.65	-0.000688672	0.115385
319	319r2	2	0	0	35	26	4	12	4	35	22	10	10	4	162	0.526627	0.360656	0.57377	0.647541	0.118166	0.0952381
319	319r2	3	0	0	48	14	4	10	5	31	25	4	0	3	144	0.66129	0.409836	0.508197	0.663934	0.0704913	0.142857
319	319r2	4	0	0	35	40	4	17	8	25	38	4	9	1	181	0.661836	0.535211	0.352113	0.711268	-0.0199042	0.0655738
319	319r2	5	0	0	37	44	0	10	1	24	35	2	6	2	161	0.775281	0.583333	0.4	0.783333	0.0608479	0
336	336r1	1	0	0	40	24	3	19	7	8	27	1	7	1	137	0.566434	0.642857	0.190476	0.738095	-0.102152	0.0652174
336	336r1	2	0	0	47	26	1	17	6	15	27	1	6	6	152	0.583893	0.5625	0.3125	0.71875	-0.0414012	0.0227273
336	336r1	3	0	0	45	30	1	15	6	11	41	0	12	16	177	0.505618	0.706897	0.189655	0.801724	-0.0456673	0.0217391
336	336r1	4	0	0	35	26	5	13	7	14	30	6	7	3	146	0.56129	0.588235	0.27451	0.72549	-0.0610563	0.113636
336	336r1	5	0	0	34	22	3	15	3	3	35	2	5	7	129	0.525926	0.853659	0.0731707	0.890244	-0.00246752	0.075
336	336r2	1	0	0	33	25	4	5	0	18	28	1	7	1	122	0.707317	0.608696	0.391304	0.804348	0.0711815	0.117647
336	336r2	2	0	0	38	21	2	12	2	18	30	1	6	0	130	0.669291	0.6	0.36	0.78	0.03322	0.0571429
336	336r2	3	0	0	38	24	2	11	1	25	32	2	9	5	149	0.608108	0.551724	0.431034	0.767241	0.0698166	0.0540541
336	336r2	4	0	0	36	18	1	14	0	20	34	1	13	8	145	0.478873	0.62963	0.37037	0.814815	0.0668424	0.030303
336	336r2	5	0	0	24	7	0	11	0	10	13	0	6	4	75	0.391304	0.565217	0.434783	0.782609	0.0827601	0
338	338r1	1	0	2	52	19	1	8	14	20	20	8	8	4	156	0.553846	0.37037	0.37037	0.555556	-0.0820502	0.0357143
338	338r1	2	0	0	36	19	2	8	16	15	12	5	1	3	117	0.654545	0.27907	0.348837	0.453488	-0.126684	0.0689655
338	338r1	3	0	0	35	22	2	11	9	17	12	6	6	8	128	0.484375	0.315789	0.447368	0.539474	-0.0206986	0.0571429
338	338r1	4	0	0	44	20	1	17	13	18	14	2	2	1	132	0.634921	0.311111	0.4	0.511111	-0.0691541	0.0263158
338	338r1	5	0	1	40	12	2	17	14	18	15	6	6	1	132	0.47541	0.319149	0.382979	0.510638	-0.084283	0.0645161
338	338r2	1	0	0	42	15	2	9	3	29	10	4	3	4	121	0.580952	0.238095	0.690476	0.583333	0.209556	0.0769231
338	338r2	2	0	0	53	25	2	10	0	34	11	0	12	4	151	0.585185	0.244444	0.755556	0.622222	0.27527	0.0540541
338	338r2	3	0	0	62	23	1	10	6	33	16	1	1	2	155	0.76378	0.290909	0.6	0.590909	0.126613	0.0294118
338	338r2	4	0	0	39	11	2	23	5	16	25	7	10	1	139	0.367647	0.543478	0.347826	0.717391	-0.0188468	0.0555556
338	338r2	5	0	0	60	32	3	17	9	34	12	1	8	4	180	0.616279	0.218182	0.618182	0.527273	0.135748	0.0576923
352	352r1	1	0	0	33	2	1	8	1	4	31	1	2	5	88	0.484848	0.861111	0.111111	0.916667	0.044635	0.0909091
352	352r1	2	0	0	25	9	3	10	7	3	36	3	1	13	110	0.439252	0.782609	0.0652174	0.815217	-0.0926567	0.136364
352	352r1	3	0	0	23	16	3	11	4	1	23	3	0	6	90	0.525773	0.821429	0.0357143	0.839286	-0.0783749	0.1
352	352r1	4	0	0	29	14	2	14	5	2	23	4	2	4	99	0.48	0.766667	0.0666667	0.8	-0.108388	0.0666667
352	352r2	1	0	0	51	24	5	13	1	24	47	2	9	3	179	0.623529	0.652778	0.333333	0.819444	0.0490907	0.119048
352	352r2	2	0	0	46	31	1	19	0	26	48	1	9	10	191	0.591837	0.648649	0.351351	0.824324	0.0635966	0.0196078
352	352r2	3	0	0	61	25	1	15	0	25	35	4	9	8	183	0.546012	0.583333	0.416667	0.791667	0.0775146	0.0243902
352	352r2	4	0	0	50	35	1	18	1	27	43	0	8	5	188	0.666667	0.605634	0.380282	0.795775	0.0577989	0.0185185
352	352r2	5	0	0	62	17	6	12	0	24	50	1	12	8	192	0.527273	0.675676	0.324324	0.837838	0.0601248	0.171429
380	380r1	1	0	0	6	1	1	2	7	0	4	3	0	0	24	0.454545	0.363636	0	0.363636	-0.454646	0.25
380	380r1	2	0	0	5	4	0	2	1	1	0	4	0	0	17	0.333333	0	0.5	0.25	0.0486	0
380	380r1	3	0	0	13	4	0	5	6	3	1	4	0	0	36	0.4375	0.1	0.3	0.25	-0.176455	0
380	380r1	4	0	0	5	4	0	3	1	0	0	1	0	0	14	0.5	0	0	0	-0.4514	0
380	380r1	5	0	0	4	2	0	2	2	0	1	2	0	0	13	0.384615	0.333333	0	0.333333	-0.463633	0
380	380r2	1	0	0	35	24	7	10	8	33	11	10	2	3	143	0.57047	0.211538	0.634615	0.528846	0.151839	0.170732
380	380r2	2	0	0	39	19	1	10	8	26	11	9	6	4	133	0.516129	0.244444	0.577778	0.533333	0.0974926	0.0333333
380	380r2	3	0	0	38	16	2	18	14	35	8	8	5	2	146	0.513889	0.140351	0.614035	0.447368	0.132661	0.0555556
380	380r2	4	0	0	27	18	3	13	26	25	10	7	3	2	134	0.602837	0.163934	0.409836	0.368852	-0.0730318	0.0882353
380	380r2	5	0	0	30	33	3	18	15	36	9	8	3	5	160	0.597826	0.15	0.6	0.45	0.117891	0.0555556
387	387r1	1	0	0	31	21	3	7	13	17	24	3	3	8	130	0.630769	0.444444	0.314815	0.601852	-0.107637	0.0967742
387	387r1	2	0	0	59	17	3	22	14	25	24	4	3	0	171	0.584416	0.380952	0.396825	0.579365	-0.0519297	0.0714286
387	387r1	3	0	1	44	19	0	16	13	20	17	5	6	5	146	0.529412	0.34	0.4	0.54	-0.0618006	0
387	387r1	4	0	0	45	23	1	22	9	16	25	2	9	5	157	0.506329	0.5	0.32	0.66	-0.073375	0.0217391
387	387r1	5	0	0	38	24	3	8	7	15	21	2	7	6	131	0.59375	0.488372	0.348837	0.662791	-0.0510918	0.0857143
387	387r2	1	0	0	37	28	0	17	15	18	19	14	2	2	152	0.5625	0.365385	0.346154	0.538462	-0.107923	0
387	387r2	2	0	0	40	26	1	25	8	38	18	4	12	1	173	0.535135	0.28125	0.59375	0.578125	0.118603	0.0192308
387	387r2	3	0	0	47	24	2	13	8	35	21	7	7	2	166	0.607595	0.328125	0.546875	0.601562	0.0818665	0.0512821
387	387r2	4	0	0	39	18	0	19	3	23	17	5	9	10	143	0.390071	0.395349	0.534884	0.662791	0.0914449	0
387	387r2	5	0	0	52	14	0	27	6	25	18	4	15	10	171	0.3	0.367347	0.510204	0.622449	0.0567739	0
392	392r1	1	0	0	26	17	0	8	3	3	46	3	5	11	122	0.553719	0.884615	0.0576923	0.913462	0.0207788	0
392	392r1	2	0	0	35	9	3	14	3	10	35	2	4	7	122	0.469027	0.729167	0.208333	0.833333	-0.00529909	0.115385
392	392r1	3	0	0	29	19	0	18	1	9	32	1	3	7	119	0.543307	0.761905	0.214286	0.869048	0.0341891	0
392	392r1	4	0	0	23	13	0	12	4	11	39	0	3	5	110	0.642857	0.722222	0.203704	0.824074	-0.0167898	0
392	392r1	5	0	0	35	11	1	22	1	4	26	2	5	9	116	0.321739	0.83871	0.129032	0.903226	0.035323	0.0294118
392	392r2	1	0	0	39	10	0	14	3	8	41	0	3	10	128	0.522124	0.788462	0.153846	0.865385	0.00239663	0
392	392r2	2	0	0	45	15	0	15	2	9	45	2	3	12	148	0.518797	0.803571	0.160714	0.883929	0.026141	0
392	392r2	3	0	0	32	8	1	11	4	6	32	1	2	7	104	0.521739	0.761905	0.142857	0.833333	-0.0372395	0.05
392	392r2	4	0	0	36	9	0	9	1	7	38	1	1	12	114	0.520833	0.826087	0.152174	0.902174	0.0435246	0
392	392r2	5	0	0	40	11	2	10	0	7	37	1	4	8	120	0.514563	0.840909	0.159091	0.920455	0.0680147	0.0869565
393	393r1	1	0	0	45	24	5	8	13	28	18	8	10	5	164	0.538462	0.305085	0.474576	0.542373	0.00408107	0.135135
393	393r1	2	0	0	37	19	4	13	20	30	20	5	2	0	150	0.677852	0.285714	0.428571	0.5	-0.0457837	0.111111
393	393r1	3	0	0	35	5	1	7	7	40	9	3	2	0	109	0.701149	0.160714	0.714286	0.517857	0.231562	0.0769231
393	393r1	4	0	0	36	16	3	10	12	21	21	2	0	0	121	0.736842	0.388889	0.388889	0.583333	-0.0569824	0.103448
393	393r1	5	1	0	46	33	2	6	17	24	24	6	4	1	163	0.75	0.369231	0.369231	0.553846	-0.0835723	0.047619
393	393r2	1	0	0	35	15	3	10	21	17	10	15	1	0	127	0.516667	0.208333	0.354167	0.385417	-0.128746	0.107143
393	393r2	2	0	0	38	19	3	13	30	20	10	4	1	0	138	0.688889	0.166667	0.333333	0.333333	-0.149642	0.0857143
393	393r2	3	0	0	42	20	10	12	17	25	20	7	0	1	154	0.61039	0.322581	0.403226	0.524194	-0.0631919	0.238095
393	393r2	4	0	0	33	15	3	8	13	17	8	11	8	1	117	0.436364	0.210526	0.447368	0.434211	-0.0354532	0.115385
393	393r2	5	0	0	49	20	10	14	19	7	8	11	2	0	140	0.451852	0.235294	0.205882	0.338235	-0.275295	0.227273
393	393r3	1	0	0	24	20	4	5	30	22	6	19	3	0	133	0.550725	0.103448	0.37931	0.293103	-0.0976817	0.137931
393	393r3	2	0	0	27	18	4	5	31	28	11	12	3	0	139	0.654676	0.157143	0.4	0.357143	-0.0825423	0.148148
393	393r3	3	0	0	24	18	4	4	11	11	9	7	2	0	90	0.630435	0.290323	0.354839	0.467742	-0.11866	0.153846
393	393r3	4	0	0	24	10	0	4	18	8	6	7	2	0	79	0.623188	0.1875	0.25	0.3125	-0.233342	0
393	393r3	5	0	0	13	7	4	1	15	11	8	7	1	1	68	0.58209	0.235294	0.323529	0.397059	-0.157648	0.333333
398	398r1	1	0	0	45	23	1	19	16	15	20	13	14	7	173	0.368421	0.392157	0.294118	0.539216	-0.150533	0.0232558
398	398r1	2	0	0	38	16	1	20	15	15	26	8	6	9	154	0.424837	0.464286	0.267857	0.598214	-0.14486	0.027027
398	398r1	3	0	0	29	15	2	18	10	15	16	10	15	7	137	0.272727	0.390244	0.365854	0.573171	-0.0795137	0.0571429
398	398r1	4	0	0	33	19	4	17	14	21	13	12	8	1	142	0.436242	0.270833	0.4375	0.489583	-0.0393533	0.1
398	398r2	1	0	0	46	19	3	20	11	13	29	10	12	25	188	0.23913	0.54717	0.245283	0.669811	-0.118963	0.0714286
398	398r2	2	0	1	46	21	3	15	17	16	30	10	6	14	179	0.438596	0.47619	0.253968	0.603175	-0.152561	0.0769231
398	398r2	3	0	0	62	24	5	16	13	14	29	5	10	9	187	0.470588	0.517857	0.25	0.642857	-0.132827	0.111111
398	398r2	4	0	0	55	30	5	22	20	22	30	8	12	16	220	0.432432	0.416667	0.305556	0.569444	-0.129313	0.0877193
398	398r2	5	0	0	54	21	1	16	16	15	26	10	10	15	184	0.380952	0.45614	0.263158	0.587719	-0.153643	0.0263158
491	491r1	1	0	0	36	19	4	19	10	27	18	2	5	0	140	0.589041	0.327273	0.490909	0.572727	0.0256803	0.0952381
491	491r1	2	0	0	42	15	2	13	6	23	28	2	6	0	137	0.632	0.491228	0.403509	0.692982	0.00516657	0.0666667
491	491r1	3	0	0	32	15	2	13	6	19	17	3	6	1	114	0.553571	0.404762	0.452381	0.630952	0.0126236	0.0666667
491	491r1	4	0	0	44	15	2	14	9	28	38	3	5	0	158	0.668966	0.506667	0.373333	0.693333	-0.0161723	0.0645161
491	491r1	5	0	0	35	21	3	5	11	12	17	9	6	0	119	0.59292	0.425	0.3	0.575	-0.131292	0.103448
491	491r2	1	0	0	40	15	2	17	6	23	13	4	7	3	130	0.467742	0.309524	0.547619	0.583333	0.0781053	0.0588235
491	491r2	2	0	0	50	25	0	22	10	30	20	6	12	4	179	0.5	0.333333	0.5	0.583333	0.0363667	0
491	491r2	3	0	0	41	20	2	18	9	21	14	4	8	4	141	0.485714	0.318182	0.477273	0.556818	0.00977707	0.05
491	491r2	4	0	0	46	22	1	21	9	28	18	5	9	3	162	0.5125	0.327273	0.509091	0.581818	0.0438621	0.0227273
491	491r2	5	1	0	44	21	2	22	8	25	16	5	7	2	152	0.496774	0.326531	0.510204	0.581633	0.0447846	0.0434783
502	502r1	1	0	0	29	27	8	8	25	10	17	5	3	1	133	0.659864	0.326923	0.192308	0.423077	-0.273011	0.186047
502	502r1	2	0	0	33	20	4	5	15	17	10	7	4	2	117	0.610619	0.238095	0.404762	0.440476	-0.0761585	0.137931
502	502r1	3	0	0	42	14	4	8	6	18	7	8	12	5	124	0.314815	0.225806	0.580645	0.516129	0.0987052	0.153846
502	502r1	4	1	0	37	13	4	16	14	6	10	13	10	7	130	0.203125	0.333333	0.2	0.433333	-0.263633	0.117647
502	502r1	5	0	0	26	20	4	12	10	11	13	12	7	7	122	0.363636	0.382353	0.323529	0.544118	-0.124725	0.111111
502	502r2	1	0	0	0	4	0	0	6	3	0	1	0	0	14	0.888889	0	0.333333	0.166667	-0.118067	0
502	502r2	2	0	0	7	2	0	0	3	0	0	2	1	0	15	0.4	0	0	0	-0.4514	0
502	502r2	3	0	0	2	1	0	2	5	1	0	2	0	0	13	0.428571	0	0.166667	0.0833333	-0.284733	0
502	502r2	4	0	0	1	3	0	3	3	3	5	1	1	1	21	0.538462	0.454545	0.272727	0.590909	-0.144859	0
502	502r2	5	0	0	0	0	0	0	5	0	1	2	0	1	9	0.333333	0.166667	0	0.166667	-0.482975	0
508	508r1	1	0	0	8	4	0	3	2	8	6	0	0	0	31	0.8	0.375	0.5	0.625	0.0491578	0
508	508r1	2	0	0	3	2	0	6	1	2	3	0	2	1	20	0.28	0.5	0.333333	0.666667	-0.0600417	0
508	508r1	3	0	0	6	3	0	2	0	5	6	0	0	0	22	0.809524	0.545455	0.454545	0.772727	0.0891686	0
508	508r1	4	0	0	17	11	2	4	1	10	11	2	2	3	63	0.587302	0.5	0.454545	0.727273	0.0611705	0.117647
508	508r1	5	0	0	5	4	0	4	0	5	6	0	2	0	26	0.586207	0.545455	0.454545	0.772727	0.0891686	0
508	508r2	1	0	0	43	22	0	18	10	33	35	7	11	2	181	0.573034	0.448718	0.423077	0.660256	0.0026609	0
508	508r2	2	0	0	67	31	2	28	13	19	23	9	7	11	210	0.441176	0.418182	0.345455	0.590909	-0.0887734	0.0327869
508	508r2	3	0	0	43	26	3	21	4	25	30	3	8	7	170	0.525424	0.508475	0.423729	0.720339	0.0352866	0.06
508	508r2	4	0	0	61	23	2	20	6	28	20	9	66	6	241	0.0844444	0.37037	0.518519	0.62963	0.0660979	0.0444444
508	508r2	5	0	0	51	25	5	17	16	22	31	10	11	3	191	0.508021	0.449275	0.318841	0.608696	-0.101307	0.106383
535	535r1	1	1	0	38	15	4	13	15	16	11	9	5	8	134	0.384615	0.261905	0.380952	0.452381	-0.0972049	0.121212
535	535r1	2	0	0	39	16	1	10	20	12	15	6	4	5	128	0.551724	0.319149	0.255319	0.446809	-0.211943	0.037037
535	535r1	3	0	0	20	27	4	13	21	6	10	8	1	1	111	0.6	0.27027	0.162162	0.351351	-0.314778	0.0909091
535	535r1	4	0	0	31	23	1	13	15	11	9	17	4	4	128	0.41791	0.257143	0.314286	0.414286	-0.164507	0.027027
535	535r1	5	0	0	42	15	6	10	15	25	9	11	1	0	134	0.544715	0.183673	0.510204	0.438776	0.02687	0.193548
535	535r2	1	0	0	36	13	11	7	41	8	6	18	2	1	143	0.434783	0.109091	0.145455	0.181818	-0.332369	0.354839
535	535r2	2	0	0	40	19	13	13	45	8	8	20	3	2	171	0.420455	0.131148	0.131148	0.196721	-0.349368	0.288889
535	535r2	3	0	0	39	21	13	10	42	7	7	21	1	2	163	0.440476	0.125	0.125	0.1875	-0.354855	0.295455
535	535r2	4	0	0	50	25	16	15	60	12	10	28	6	4	226	0.405172	0.121951	0.146341	0.195122	-0.33316	0.285714
639	639r1	1	0	0	20	4	0	2	2	2	3	1	1	0	35	0.619048	0.428571	0.285714	0.571429	-0.144006	0
639	639r1	2	0	0	7	3	0	5	2	5	6	1	2	2	33	0.411765	0.461538	0.384615	0.653846	-0.0294923	0
639	639r1	3	0	1	12	7	0	5	2	11	4	2	3	0	47	0.565217	0.235294	0.647059	0.558824	0.165882	0
639	639r1	4	0	0	8	3	0	3	2	4	6	1	2	1	30	0.5	0.5	0.333333	0.666667	-0.0600417	0
639	639r1	5	0	0	13	6	1	7	3	8	8	2	3	2	53	0.444444	0.421053	0.421053	0.631579	-0.0119496	0.0714286
639	639r2	1	0	0	38	31	2	3	2	13	23	2	4	7	125	0.707317	0.605263	0.342105	0.776316	0.019338	0.0555556
639	639r2	2	0	0	43	10	0	9	4	16	17	1	4	3	107	0.590361	0.459459	0.432432	0.675676	0.0172813	0
639	639r2	3	0	0	47	18	0	8	6	21	17	0	6	0	123	0.72549	0.386364	0.477273	0.625	0.0304713	0
639	639r2	4	0	0	47	14	1	6	9	18	12	2	2	0	111	0.741176	0.307692	0.461538	0.538462	-0.00838462	0.047619
639	639r2	5	0	0	29	8	0	8	7	14	12	7	1	5	91	0.461538	0.363636	0.424242	0.575758	-0.0304039	0
705	705r1	1	0	0	40	22	4	14	6	22	25	7	10	3	153	0.503268	0.471698	0.415094	0.679245	0.00619968	0.1
705	705r1	2	0	0	42	21	4	15	8	25	24	5	8	5	157	0.522581	0.421053	0.438596	0.640351	0.00559428	0.1
705	705r1	3	0	0	45	24	3	19	10	29	28	6	10	9	183	0.48913	0.41791	0.432836	0.634328	-0.0015072	0.0652174
705	705r1	4	0	0	39	19	1	18	7	25	21	7	7	4	148	0.496599	0.396226	0.471698	0.632075	0.0285957	0.0263158
705	705r1	5	0	0	31	16	2	20	6	18	20	6	9	2	130	0.430657	0.454545	0.409091	0.659091	-0.00849504	0.0526316
705	705r2	1	0	0	35	12	0	14	1	19	31	1	8	12	133	0.435484	0.607843	0.372549	0.794118	0.0517674	0
705	705r2	2	0	0	51	13	1	9	4	7	30	3	3	4	125	0.587629	0.731707	0.170732	0.817073	-0.0403685	0.0434783
705	705r2	3	0	0	36	12	3	11	4	23	31	1	13	15	149	0.381295	0.534483	0.396552	0.732759	0.0240699	0.115385
705	705r2	4	0	0	29	16	0	9	4	21	32	4	10	15	140	0.441176	0.561404	0.368421	0.745614	0.0137657	0
705	705r2	5	0	0	26	11	0	9	1	18	48	1	7	15	136	0.507692	0.716418	0.268657	0.850746	0.0424964	0
748	748r3	1	0	0	51	28	2	12	19	24	8	16	4	2	166	0.541401	0.156863	0.470588	0.392157	-0.0119389	0.047619
748	748r3	2	0	0	30	35	2	8	21	10	11	7	1	3	128	0.706294	0.261905	0.238095	0.380952	-0.240062	0.0444444
748	748r3	3	0	0	42	19	4	9	20	19	18	13	4	1	149	0.553957	0.315789	0.333333	0.482456	-0.134734	0.125
748	748r3	4	0	0	39	20	3	8	18	21	21	11	4	2	147	0.597122	0.35	0.35	0.525	-0.108899	0.0967742
748	748r3	5	0	0	46	21	3	9	13	33	13	12	6	4	160	0.537415	0.220339	0.559322	0.5	0.0770174	0.0909091
80	80r1	1	0	0	20	18	5	5	6	13	1	0	1	0	69	0.714286	0.05	0.65	0.375	0.183781	0.178571
80	80r1	2	0	0	13	10	3	5	1	19	1	3	4	1	60	0.507692	0.047619	0.904762	0.5	0.439145	0.166667
80	80r1	3	0	0	20	8	3	4	5	13	2	2	2	0	59	0.592593	0.1	0.65	0.425	0.173545	0.2
80	80r1	4	0	1	20	9	1	6	2	10	1	1	2	0	53	0.583333	0.0769231	0.769231	0.461538	0.296931	0.0625
80	80r1	5	0	0	12	14	3	9	7	15	1	2	4	0	67	0.555556	0.0434783	0.652174	0.369565	0.187628	0.115385
80	80r2	1	0	0	42	36	4	6	8	42	3	16	24	2	183	0.44385	0.0566038	0.792453	0.45283	0.324619	0.0869565
80	80r2	2	0	0	45	22	2	17	11	52	7	14	15	3	188	0.445652	0.1	0.742857	0.471429	0.266402	0.0487805
80	80r2	3	0	0	36	20	7	21	14	33	15	14	12	3	175	0.390374	0.241935	0.532258	0.508065	0.051713	0.145833
80	80r2	4	1	1	41	19	5	14	9	35	6	14	11	2	157	0.393548	0.12	0.7	0.47	0.220734	0.128205
80	80r2	5	0	0	45	23	11	1	8	31	7	7	15	4	152	0.464789	0.152174	0.673913	0.48913	0.191662	0.314286
83	83r1	1	0	0	11	5	1	6	7	18	13	5	4	1	71	0.527778	0.342105	0.473684	0.578947	0.0124793	0.0833333
83	83r1	2	0	0	37	25	1	14	10	31	10	4	5	3	140	0.622378	0.196078	0.607843	0.5	0.124582	0.025
83	83r1	3	0	0	30	9	3	9	5	16	11	6	5	3	97	0.409091	0.34375	0.5	0.59375	0.0392661	0.142857
83	83r1	4	0	1	35	13	3	13	8	31	6	4	3	2	119	0.553571	0.133333	0.688889	0.477778	0.208156	0.103448
83	83r1	5	0	0	37	17	4	4	10	15	7	8	4	0	106	0.574468	0.21875	0.46875	0.453125	-0.0136503	0.16
83	83r2	1	0	0	21	8	5	2	3	23	15	0	3	4	84	0.641026	0.365854	0.560976	0.646341	0.107053	0.333333
83	83r2	2	0	0	31	16	0	8	4	17	8	1	4	5	94	0.586207	0.275862	0.586207	0.568966	0.110152	0
83	83r2	3	0	0	19	8	2	8	3	17	15	0	4	2	78	0.584416	0.428571	0.485714	0.671429	0.0559939	0.111111
83	83r2	4	0	0	20	4	3	4	4	13	9	4	5	6	72	0.301587	0.346154	0.5	0.596154	0.0399635	0.272727
83	83r2	5	0	0	26	13	5	6	7	16	8	1	5	5	92	0.511111	0.258065	0.516129	0.516129	0.0374558	0.208333
892	892r1	1	0	0	30	14	6	8	19	15	3	9	5	2	111	0.449541	0.0810811	0.405405	0.283784	-0.0677153	0.214286
892	892r1	2	0	0	39	14	4	13	18	17	5	7	8	0	125	0.452991	0.125	0.425	0.3375	-0.0548547	0.129032
892	892r1	3	0	0	36	17	10	8	22	22	3	13	8	0	139	0.434783	0.0638298	0.468085	0.297872	-0.0014234	0.285714
892	892r1	4	0	0	31	15	3	16	6	16	7	13	12	0	119	0.278689	0.241379	0.551724	0.517241	0.0711231	0.0882353
892	892r1	5	0	0	21	10	3	23	4	23	10	16	14	0	124	0.194245	0.27027	0.621622	0.581081	0.144682	0.0833333
892	892r2	1	0	0	47	24	6	7	42	7	2	10	3	0	148	0.623188	0.0392157	0.137255	0.107843	-0.326155	0.162162
892	892r2	2	0	0	46	20	4	15	42	7	8	14	3	1	160	0.51634	0.140351	0.122807	0.201754	-0.358567	0.102564
892	892r2	3	0	0	35	16	11	12	29	6	5	21	2	0	137	0.347518	0.125	0.15	0.2	-0.329855	0.282051
892	892r2	4	0	0	34	17	5	14	38	6	4	21	2	1	142	0.402778	0.0833333	0.125	0.145833	-0.348552	0.138889
892	892r2	5	0	0	42	22	6	14	35	11	5	10	2	1	148	0.554054	0.0980392	0.215686	0.205882	-0.260454	0.142857
897	897r1	1	1	0	54	28	10	21	18	14	13	16	7	4	185	0.385417	0.288889	0.311111	0.444444	-0.162659	0.166667
897	897r1	2	0	0	44	16	4	20	24	6	9	32	6	3	164	0.1875	0.230769	0.153846	0.307692	-0.327715	0.1
897	897r1	3	0	0	49	22	4	16	18	7	7	17	7	5	152	0.324138	0.21875	0.21875	0.328125	-0.26365	0.0952381
897	897r1	4	0	0	56	19	7	15	17	6	14	12	4	5	155	0.385714	0.378378	0.162162	0.459459	-0.287503	0.170732
897	897r1	5	0	0	59	34	11	13	17	7	9	28	3	1	182	0.381215	0.272727	0.212121	0.378788	-0.264437	0.189655
897	897r2	1	0	0	43	16	6	19	18	1	4	52	1	4	164	-0.0123457	0.173913	0.0434783	0.195652	-0.439715	0.146341
897	897r2	2	0	0	46	27	1	18	30	15	2	23	10	1	173	0.387283	0.0425532	0.319149	0.202128	-0.145153	0.0217391
897	897r2	3	0	0	54	21	6	21	16	42	6	12	11	1	190	0.445652	0.09375	0.65625	0.421875	0.180824	0.125
897	897r2	4	0	0	46	22	4	21	11	36	7	15	14	4	180	0.359116	0.12963	0.666667	0.462963	0.186308	0.0851064
897	897r2	5	0	0	39	15	5	20	51	2	9	24	1	0	166	0.401198	0.145161	0.0322581	0.16129	-0.449504	0.125
91	91r1	1	0	0	33	18	7	11	18	24	2	12	9	1	135	0.42029	0.0454545	0.545455	0.318182	0.0803936	0.194444
91	91r1	2	0	0	30	10	4	10	21	13	7	12	7	5	119	0.327434	0.170732	0.317073	0.329268	-0.166036	0.166667
91	91r1	3	0	0	18	23	14	14	12	14	7	11	5	0	118	0.417219	0.212121	0.424242	0.424242	-0.0585072	0.27451
91	91r1	4	1	0	29	13	13	7	16	33	10	3	8	0	132	0.536232	0.169492	0.559322	0.449153	0.0762507	0.382353
91	91r1	5	0	0	37	5	7	16	14	25	5	18	7	4	138	0.193798	0.113636	0.568182	0.397727	0.0897304	0.25
91	91r1	6	0	0	16	5	3	2	11	8	1	6	1	0	53	0.489362	0.05	0.4	0.25	-0.0662187	0.3
91	91r2	1	0	0	25	6	6	7	6	21	1	2	10	0	84	0.358974	0.0357143	0.75	0.410714	0.287548	0.315789
91	91r2	2	0	0	13	4	6	3	5	13	1	5	1	2	53	0.358491	0.0526316	0.684211	0.394737	0.217339	0.461538
91	91r2	3	0	0	22	13	3	2	5	25	5	6	2	1	84	0.65	0.142857	0.714286	0.5	0.232704	0.166667
91	91r2	4	0	0	34	9	2	6	6	21	4	2	2	0	86	0.652174	0.129032	0.677419	0.467742	0.197124	0.117647
91	91r2	5	0	0	17	11	3	8	2	24	4	0	4	1	74	0.594937	0.133333	0.8	0.533333	0.319267	0.136364
91	91r2	6	0	0	20	11	3	8	2	24	4	0	4	1	77	0.594937	0.133333	0.8	0.533333	0.319267	0.136364

## Sheet: Data S3 White Drive
Line	Vial	M Rw	M WT	M w	F R	F Rm	F Rw	F WT	F m	F w	Total	Drive Conversion Efficiency	Embryo r2 Formation Rate (in flies with the drive)	Embryo r2 MosaicRate (in flies with the drive)	Embryo adjusted with 50% mosaic	Mosaic Difference	Male WT Rate
392	1	97	2	25	1	5	55	2	2	16	205	0.541463	0.901639	0.0819672	0.942623	0.0670981	0.016129
392	2	72	4	27	3	0	61	4	1	22	194	0.402062	0.953125	0	0.953125	0.0550325	0.038835
392	3	77	1	32	2	17	42	1	5	11	188	0.468085	0.688525	0.278689	0.827869	0.026157	0.00909091
392	4	43	1	22	0	5	38	3	3	16	131	0.312977	0.883721	0.116279	0.94186	0.0782221	0.0151515
392	5	41	0	14	1	1	46	2	4	22	131	0.358779	0.958333	0.0208333	0.96875	0.0832078	0
409	1	73	0	13	3	20	51	2	2	10	174	0.689655	0.689189	0.27027	0.824324	0.0183505	0
409	2	98	0	12	4	11	40	3	5	7	180	0.7	0.727273	0.2	0.827273	-0.0155124	0
409	3	64	2	11	2	16	42	2	3	5	147	0.687075	0.7	0.266667	0.833333	0.0248117	0.025974
409	4	69	1	12	5	9	46	1	1	7	151	0.708609	0.766667	0.15	0.841667	-0.025055	0.0121951
409	5	75	0	8	5	13	57	2	2	7	169	0.775148	0.76	0.173333	0.846667	-0.00876827	0
900	1	90	0	30	38	17	25	13	5	3	221	0.538462	0.3125	0.2125	0.41875	-0.256336	0
900	2	74	2	23	22	28	14	12	6	5	186	0.483871	0.21875	0.4375	0.4375	-0.0449003	0.020202
900	3	80	1	31	25	15	31	13	5	5	206	0.466019	0.43662	0.211268	0.542254	-0.214825	0.00892857
900	4	84	0	12	24	15	25	10	8	5	183	0.617486	0.390625	0.234375	0.507812	-0.21085	0
900	5	69	3	18	37	20	16	11	7	4	185	0.535135	0.219178	0.273973	0.356164	-0.208402	0.0333333
Line	Vial	M Rw	M WT	M w	F R	F Rm	F Rw	F WT	F m	F w	Total	Drive Conversion Efficiency	Embryo r2 Formation Rate (in flies with the drive)	Embryo r2 MosaicRate (in flies with the drive)	Embryo adjusted with 50% mosaic	Mosaic Difference	Male WT Rate
392	combined	330	8	120	7	28	242	12	15	87	849	0.429918	0.873646	0.101083	0.924188	0.050247	0.0174672
409	combined	379	3	56	19	69	236	10	13	36	821	0.712546	0.728395	0.212963	0.834877	-0.00143617	0.00684932
900	combined	397	6	114	146	95	111	59	31	22	981	0.527013	0.315341	0.269886	0.450284	-0.198287	0.0116054

## Sheet: Data S4 Embryo r2 GWAS
Designation	Location	P Value	Adjusted P Value	Gene	Location in Gene	Full Name	CG	FlyBase Annotation
p_wald576678	chr3R:8919345	1.05987e-07	0.0957362	pyd	intron deep	polychaetoid	CG43140	Polychaetoid is a broadly acting protein that is associated with multiple proteins at the surface and within the cytoskeleton, connecting events between the two.
p_wald576679	chr3R:8919458	3.26861e-07	0.147624	pyd	intron deep	polychaetoid	CG43140	Polychaetoid is a broadly acting protein that is associated with multiple proteins at the surface and within the cytoskeleton, connecting events between the two.
p_wald253970	chr2R:17762194	1.00868e-06	0.231624	CG5009	CDS	-	CG5009	Acyl-CoA dehydrogenase-like, C-terminal; Acyl-CoA dehydrogenase/oxidase, N-terminal and middle domain superfamily; Acyl-CoA dehydrogenase/oxidase, N-terminal domain superfamily; Acyl-CoA oxidase; Acyl-CoA oxidase, C-terminal; Acyl-CoA oxidase/dehydrogenase, central domain; Acyl-coenzyme A oxidase, N-terminal; Peroxisomal acyl-coenzyme A oxidase. Its molecular function is described by: flavin aden…
p_wald574657	chr3R:8255320	1.42683e-06	0.231624	mtg	intron deep	mind the gap	CG7549	Chitin binding domain; Chitin binding domain superfamily; Winged helix-like DNA-binding domain superfamily. Its molecular function is described by: chitin binding; carbohydrate derivative binding. It is involved in the biological process described with: chitin metabolic process; synapse assembly.
p_wald253211	chr2R:17723899	1.48205e-06	0.231624	Dlish	intron	Dachs ligand with SH3s	CG10933	Protein features are: SH3 domain; SH3-like domain superfamily. Its molecular function is described by: cadherin binding; protein binding. It is involved in the biological process described with: protein localization involved in establishment of planar polarity; positive regulation of hippo signaling; establishment of epithelial cell planar polarity; establishment of planar polarity.
p_wald170219	chr2R:10738229	1.54307e-06	0.231624	CG7220	3'UTR	-	CG7220	Ubiquitin-conjugating enzyme E2; Ubiquitin-conjugating enzyme/RWD-like. Its molecular function is described by: ubiquitin protein ligase binding; ubiquitin-protein transferase activity; ubiquitin protein ligase activity. It is involved in the biological process described with: proteasome-mediated ubiquitin-dependent protein catabolic process; protein monoubiquitination; protein polyubiquitination.
p_wald253966	chr2R:17762090	1.79498e-06	0.231624	CG5009	intron	-	CG5009	Acyl-CoA dehydrogenase-like, C-terminal; Acyl-CoA dehydrogenase/oxidase, N-terminal and middle domain superfamily; Acyl-CoA dehydrogenase/oxidase, N-terminal domain superfamily; Acyl-CoA oxidase; Acyl-CoA oxidase, C-terminal; Acyl-CoA oxidase/dehydrogenase, central domain; Acyl-coenzyme A oxidase, N-terminal; Peroxisomal acyl-coenzyme A oxidase. Its molecular function is described by: flavin aden…
p_wald464744	chr3L:10813329	2.46791e-06	0.278653	none	not within 2kb of gene	-	-	-
p_wald622141	chr3R:16949251	4.77156e-06	0.386023	Abd-B	intron deep	Abdominal B	CG11648	Homeobox domain; Homeobox domain, metazoa; Homeobox, conserved site; Homeobox-like domain superfamily. Its molecular function is described by: transcription regulatory region sequence-specific DNA binding; RNA polymerase II distal enhancer sequence-specific DNA binding; transcription factor activity, sequence-specific DNA binding. It is involved in the biological process described with 33 unique …
p_wald622146	chr3R:16949435	4.95754e-06	0.386023	Abd-B	intron deep	Abdominal B	CG11648	Homeobox domain; Homeobox domain, metazoa; Homeobox, conserved site; Homeobox-like domain superfamily. Its molecular function is described by: transcription regulatory region sequence-specific DNA binding; RNA polymerase II distal enhancer sequence-specific DNA binding; transcription factor activity, sequence-specific DNA binding. It is involved in the biological process described with 33 unique …
p_wald574311	chr3R:8103594	5.47902e-06	0.386023	CG7900	intron deep	-	CG7900	Protein features are: Amidase signature (AS) superfamily; Amidase signature domain. Its molecular function is unknown.
p_wald576677	chr3R:8919344	5.98076e-06	0.386023	pyd	intron deep	polychaetoid	CG43140	Guanylate kinase-like domain; Guanylate kinase/L-type calcium channel beta subunit; P-loop containing nucleoside triphosphate hydrolase; PDZ domain; PDZ superfamily; SH3 domain; SH3-like domain superfamily; ZU5 domain. Its molecular function is described by: cell adhesion molecule binding; ubiquitin protein ligase binding; WW domain binding; guanylate kinase activity. It is involved in the biolog…
p_wald170218	chr2R:10738223	6.65277e-06	0.386023	CG7220	3'UTR	-	CG7220	Ubiquitin-conjugating enzyme E2; Ubiquitin-conjugating enzyme/RWD-like. Its molecular function is described by: ubiquitin protein ligase binding; ubiquitin-protein transferase activity; ubiquitin protein ligase activity. It is involved in the biological process described with: proteasome-mediated ubiquitin-dependent protein catabolic process; protein monoubiquitination; protein polyubiquitination.
p_wald633411	chr3R:18744421	6.70402e-06	0.386023	CG7718	CDS	-	CG7718	CDP-alcohol phosphatidyltransferase class-II family; Phospholipase D-like domain; Phospholipase D/Transphosphatidylase. Its molecular function is described by: CDP-diacylglycerol-glycerol-3-phosphate 3-phosphatidyltransferase activity; CDP-alcohol phosphatidyltransferase activity. It is involved in the biological process described with: cardiolipin biosynthetic process.
p_wald526511	chr3L:15456467	6.92412e-06	0.386023	none	not within 2kb of gene	-	-	-
p_wald119798	chr2R:6234808	8.61961e-06	0.386023	bin3	intron	bicoid-interacting protein 3	CG8276	Bin3-type S-adenosyl-L-methionine binding domain; Methyltransferase domain; RNA methyltransferase bin3, C-terminal; S-adenosyl-L-methionine-dependent methyltransferase. Its molecular function is described by: RNA polymerase II transcription factor binding; methyltransferase activity; snRNA binding; protein binding. It is involved in the biological process described with: negative regulation of tr…
p_wald797729	chrX:11221109	8.79328e-06	0.386023	CG44422	3'UTR	-	CG44422	EF-Hand 1, calcium-binding site; EF-hand domain; EF-hand domain pair. Its molecular function is described by: calcium ion binding. The biological processes in which it is involved are not known.
p_wald242778	chr2R:16962691	8.96231e-06	0.386023	none	not within 2kb of gene	-	-	-
p_wald193505	chr2R:12877916	9.22626e-06	0.386023	Nmda	CDS	N-methyl-D-aspartate receptor-associated protein	CG3798	Bax inhibitor 1-related. Its molecular function is unknown. It is involved in the biological process described with: regulation of glucose metabolic process.
p_wald155116	chr2R:9457770	9.57543e-06	0.386023	Camta	promoter/intron	Calmodulin-binding transcription activator	CG42332	Calmodulin-binding transcription activator (Camta) is a Ca2+-responsive transcription factor that either binds directly to DNA sequences containing a CGCG core motif or functions as a coactivator of NKX2 transcription factors. Camta mediates various physiological functions, including the regulation of visual signal transduction, memory formation and cell survival.
p_wald155117	chr2R:9457771	9.57543e-06	0.386023	Camta	promoter	Calmodulin-binding transcription activator	CG42332	Calmodulin-binding transcription activator (Camta) is a Ca2+-responsive transcription factor that either binds directly to DNA sequences containing a CGCG core motif or functions as a coactivator of NKX2 transcription factors. Camta mediates various physiological functions, including the regulation of visual signal transduction, memory formation and cell survival.
p_wald242781	chr2R:16962723	1.15136e-05	0.386023	none	not within 2kb of gene	-	CR44376	-
p_wald572677	chr3R:7677708	1.16263e-05	0.386023	Nlg1	intron deep	Neuroligin 1	CG31146	Neuroligin 1 (Nlg1) is a transsynaptic adhesion protein of the neuroligin family that is expressed in muscles and accumulates at the postsynaptic side of neuromuscular junctions. Lack of Nlg1 function causes smaller and underdeveloped neuromuscular junctions due to insufficient postsynaptic maturation and differentiation of synaptic boutons.
p_wald572693	chr3R:7682779	1.16263e-05	0.386023	Nlg1	intron deep	Neuroligin 1	CG31146	Neuroligin 1 (Nlg1) is a transsynaptic adhesion protein of the neuroligin family that is expressed in muscles and accumulates at the postsynaptic side of neuromuscular junctions. Lack of Nlg1 function causes smaller and underdeveloped neuromuscular junctions due to insufficient postsynaptic maturation and differentiation of synaptic boutons.
p_wald582931	chr3R:10164530	1.16778e-05	0.386023	Best1	intron	Bestrophin 1	CG6264	Bestrophin; Bestrophin/UPF0187. Its molecular function is described by: intracellular calcium activated chloride channel activity; volume-sensitive chloride channel activity; chloride channel activity. It is involved in the biological process described with: cellular water homeostasis; cell volume homeostasis; chloride transport.
p_wald793042	chrX:10737059	1.20842e-05	0.386023	stx	intron deep	stuxnet	CG9725	Ubiquitin domain; Ubiquitin-like domain superfamily. Its molecular function is unknown. It is involved in the biological process described with: proteasomal ubiquitin-independent protein catabolic process.
p_wald242798	chr2R:16963618	1.21488e-05	0.386023	none	not within 2kb of gene	-	CR44376	-
p_wald789849	chrX:10294157	1.22869e-05	0.386023	alpha-Man-Ia	intron deep	α-Mannosidase class I a	CG42275	Protein features are: Glycoside hydrolase family 47; Seven-hairpin glycosidases; Six-hairpin glycosidase-like superfamily. Its molecular function is described by: mannosyl-oligosaccharide 1,2-alpha-mannosidase activity; calcium ion binding. It is involved in the biological process described with: response to anesthetic; determination of adult lifespan; encapsulation of foreign target; N-glycan pr…
p_wald577365	chr3R:9081589	1.26971e-05	0.386023	pum	intron	pumilio	CG9755	Sequence-specific RNA-binding protein that acts as a post-transcriptional repressor by binding the 3'-UTR of mRNA targets. Binds to an RNA consensus sequence, the Pumilio Response Element (PRE), 5'-UGUANAUA-3', that is related to the Nanos Response Element (NRE) (PubMed:1459455, PubMed:1576962, PubMed:9404893, PubMed:9660969, PubMed:22345517). Mediates post-transcriptional repression of transcrip…
p_wald591575	chr3R:11769862	1.28207e-05	0.386023	l(3)neo38	CDS	lethal (3) neo38	CG6930	Zinc finger C2H2 superfamily; Zinc finger C2H2-type. Its molecular function is described by: nucleic acid binding; RNA polymerase II transcription factor activity, sequence-specific DNA binding. It is involved in the biological process described with: regulation of chromatin silencing.
p_wald748774	chrX:5926654	1.46632e-05	0.427259	CG3726	intron deep	-	CG3726	DNA binding. It is involved in the biological process described with: regulation of transcription by RNA polymerase II.
p_wald404542	chr3L:7054639	1.76578e-05	0.442005	Mp	3'UTR	Multiplexin	CG42543	C-type lectin fold; C-type lectin-like/link domain superfamily; Collagen triple helix repeat; Collagenase NC10/endostatin; Concanavalin A-like lectin/glucanase domain superfamily; Laminin G domain. Its molecular function is described by: structural molecule activity; carbohydrate binding. It is involved in the biological process described with: motor neuron axon guidance; skeletal muscle atrophy;…
p_wald387332	chr3L:5891260	1.79062e-05	0.442005
p_wald443866	chr3L:9583640	1.8755e-05	0.442005	CG42673	intron	-	CG42673	PH-like domain superfamily; PTB/PI domain. Its molecular function is described by: . It is involved in the biological process described with: .
p_wald527288	chr3L:15580378	1.8762e-05	0.442005	mrn	CDS	marionette	CG7764	Transcription factor TFIIH subunit p52/Tfb2. Its molecular function is described by: ATPase activator activity; ATP-dependent DNA helicase activity; DNA binding transcription factor activity; double-stranded DNA binding; RNA polymerase II carboxy-terminal domain kinase activity; transcription factor activity, core RNA polymerase binding. It is involved in the biological process described with: ph…
p_wald577698	chr3R:9165831	1.90358e-05	0.442005	pum	intron deep	pumilio	CG9755	Sequence-specific RNA-binding protein that acts as a post-transcriptional repressor by binding the 3'-UTR of mRNA targets. Binds to an RNA consensus sequence, the Pumilio Response Element (PRE), 5'-UGUANAUA-3', that is related to the Nanos Response Element (NRE) (PubMed:1459455, PubMed:1576962, PubMed:9404893, PubMed:9660969, PubMed:22345517). Mediates post-transcriptional repression of transcrip…
p_wald45467	chr2L:8039362	1.91758e-05	0.442005	Cka	3'UTR	Connector of kinase to AP-1	CG7392	G-protein beta WD-40 repeat; Striatin, N-terminal; WD40 repeat; WD40 repeat, conserved site; WD40-repeat-containing domain; WD40-repeat-containing domain superfamily; WD40/YVTN repeat-like-containing domain superfamily. Its molecular function is described by: protein binding. It is involved in the biological process described with: positive regulation of Ras protein signal transduction; dorsal cl…
p_wald594950	chr3R:12693319	2.12248e-05	0.442005
p_wald236375	chr2R:16517576	2.23131e-05	0.442005	Sema2a	intron deep	Semaphorin 2a	CG4700	Immunoglobulin subtype; Immunoglobulin-like domain; Immunoglobulin-like domain superfamily; Immunoglobulin-like fold; Sema domain; Sema domain superfamily; Semaphorin; WD40/YVTN repeat-like-containing domain superfamily. Its molecular function is described by: protein binding. It is involved in the biological process described with: drinking behavior; olfactory bulb axon guidance; dendrite guidan…
p_wald601295	chr3R:13804032	2.23261e-05	0.442005
p_wald170216	chr2R:10738211	2.26381e-05	0.442005	CG7220	3'UTR	-	CG7220	Ubiquitin-conjugating enzyme E2; Ubiquitin-conjugating enzyme/RWD-like. Its molecular function is described by: ubiquitin-protein transferase activity; ubiquitin protein ligase binding; ubiquitin protein ligase activity. It is involved in the biological process described with: proteasome-mediated ubiquitin-dependent protein catabolic process; protein monoubiquitination; protein polyubiquitination.
p_wald622145	chr3R:16949429	2.26862e-05	0.442005	Abd-B	intron deep	Abdominal B	CG11648	Homeobox domain; Homeobox domain, metazoa; Homeobox, conserved site; Homeobox-like domain superfamily. Its molecular function is described by: transcription regulatory region sequence-specific DNA binding; RNA polymerase II distal enhancer sequence-specific DNA binding; transcription factor activity, sequence-specific DNA binding. It is involved in the biological process described with 33 unique …
p_wald602008	chr3R:13904001	2.27289e-05	0.442005	ems	3'UTR	empty spiracles	CG2988	Homeobox domain; Homeobox, conserved site; Homeobox-like domain superfamily. Its molecular function is described by: RNA polymerase II distal enhancer sequence-specific DNA binding; enhancer sequence-specific DNA binding. It is involved in the biological process described with 13 unique terms, many of which group under: embryonic development via the syncytial blastoderm; regulation of RNA metabol…
p_wald119791	chr2R:6234400	2.28451e-05	0.442005
p_wald85319	chr2L:16353328	2.28509e-05	0.442005	CG4455	5'UTR	-	CG4455	Unknown
p_wald119793	chr2R:6234505	2.29581e-05	0.442005
p_wald253958	chr2R:17761965	2.29986e-05	0.442005
p_wald622147	chr3R:16949490	2.39207e-05	0.45015
p_wald622143	chr3R:16949393	2.54505e-05	0.455887
p_wald119792	chr2R:6234451	2.54699e-05	0.455887
p_wald170217	chr2R:10738221	2.57397e-05	0.455887	CG7220	3'UTR	-	CG7220	Ubiquitin-conjugating enzyme E2; Ubiquitin-conjugating enzyme/RWD-like. Its molecular function is described by: ubiquitin-protein transferase activity; ubiquitin protein ligase binding; ubiquitin protein ligase activity. It is involved in the biological process described with: proteasome-mediated ubiquitin-dependent protein catabolic process; protein monoubiquitination; protein polyubiquitination.
p_wald119800	chr2R:6234922	2.66943e-05	0.463702
p_wald748215	chrX:5889578	2.75207e-05	0.469037
p_wald577700	chr3R:9165906	2.83943e-05	0.474963	pum	intron deep	pumilio	CG9755	Sequence-specific RNA-binding protein that acts as a post-transcriptional repressor by binding the 3'-UTR of mRNA targets. Binds to an RNA consensus sequence, the Pumilio Response Element (PRE), 5'-UGUANAUA-3', that is related to the Nanos Response Element (NRE) (PubMed:1459455, PubMed:1576962, PubMed:9404893, PubMed:9660969, PubMed:22345517). Mediates post-transcriptional repression of transcrip…
p_wald622144	chr3R:16949410	2.97228e-05	0.483092
p_wald505111	chr3L:13256998	3.11841e-05	0.483092
p_wald797727	chrX:11221089	3.12467e-05	0.483092	CG44422	3'UTR	-	CG44422	EF-Hand 1, calcium-binding site; EF-hand domain; EF-hand domain pair. Its molecular function is described by: calcium ion binding. The biological processes in which it is involved are not known.
p_wald808849	chrX:12602766	3.15262e-05	0.483092	Sec16	intron	Secretory 16	CG32654	Ancestral coatomer element 1, Sec16/Sec31; COPII coat assembly protein, Sec16. Its molecular function is described by: Ras GTPase binding. It is involved in the biological process described with: protein localization to endoplasmic reticulum exit site; regulation of COPII vesicle coating; cellular response to amino acid starvation; Golgi organization; ER to Golgi vesicle-mediated transport; endop…
p_wald577366	chr3R:9081709	3.15543e-05	0.483092
p_wald182839	chr2R:12027788	3.27537e-05	0.487748
p_wald56255	chr2L:9774169	3.29383e-05	0.487748	ppk16	intron	pickpocket 16	CG34059	Epithelial sodium channel; Epithelial sodium channel, conserved site. Its molecular function is described by: sodium channel activity. It is involved in the biological process described with: regulation of synaptic activity; sodium ion transport.
p_wald793041	chrX:10737039	3.41566e-05	0.493078
p_wald476671	chr3L:11464221	3.43901e-05	0.493078
p_wald748776	chrX:5927012	3.75261e-05	0.527131	CG3726	intron deep	-	CG3726	BTB/POZ domain; DNA binding HTH domain, Psq-type; Homeobox-like domain superfamily; SKP1/BTB/POZ domain superfamily. Its molecular function is described by: DNA binding. It is involved in the biological process described with: regulation of transcription by RNA polymerase II.
p_wald573488	chr3R:7930811	3.79322e-05	0.527131
p_wald622151	chr3R:16949864	3.85603e-05	0.52774
p_wald80791	chr2L:15068833	3.91861e-05	0.5283
p_wald741713	chrX:5340152	4.02231e-05	0.534306
p_wald570584	chr3R:6965163	4.14785e-05	0.542996
p_wald572629	chr3R:7661489	4.24477e-05	0.547747	Nlg1	intron deep	Neuroligin 1	CG31146	Neuroligin 1 (Nlg1) is a transsynaptic adhesion protein of the neuroligin family that is expressed in muscles and accumulates at the postsynaptic side of neuromuscular junctions. Lack of Nlg1 function causes smaller and underdeveloped neuromuscular junctions due to insufficient postsynaptic maturation and differentiation of synaptic boutons.
p_wald497333	chr3L:12710174	4.44238e-05	0.55523
p_wald756803	chrX:6780901	4.55639e-05	0.55523	shf	intron	shifted	CG3135	EGF-like domain; EGF-like, conserved site; WIF domain; WIF domain superfamily; Wnt inhibitory factor (WIF)-1. Its molecular function is described by: protein binding. It is involved in the biological process described with: smoothened signaling pathway; regulation of smoothened signaling pathway; synaptic target recognition; protein stabilization; positive regulation of smoothened signaling pathw…
p_wald527865	chr3L:15641779	4.63342e-05	0.55523	comm3	intron deep	comm3	CG42334	Commissureless. Its molecular function is unknown. It is involved in the biological process described with: autophagic cell death; salivary gland cell autophagic cell death; axon guidance.
p_wald398295	chr3L:6651984	4.63747e-05	0.55523
p_wald594985	chr3R:12697418	4.64873e-05	0.55523
p_wald105127	chr2R:2690045	4.67158e-05	0.55523
p_wald243006	chr2R:16977291	4.76321e-05	0.555984	Cbp53E	intron	Calbindin 53E	CG6702	Calbindin-32, EF-hand domain; EF-Hand 1, calcium-binding site; EF-hand domain; EF-hand domain pair. Its molecular function is described by: calcium ion binding. It is involved in the biological process described with: regulation of cytosolic calcium ion concentration; negative regulation of response to wounding.
p_wald155159	chr2R:9462026	4.80102e-05	0.555984
p_wald797728	chrX:11221091	4.9694e-05	0.568199
p_wald589198	chr3R:11309718	5.22214e-05	0.572507	none	-	-	-
p_wald105111	chr2R:2687475	5.26219e-05	0.572507
p_wald338719	chr3L:2915084	5.39138e-05	0.572507	Shab	intron deep	Shaker cognate b	CG43128	BTB/POZ domain; Ion transport domain; Potassium channel tetramerisation-type BTB domain; Potassium channel, voltage dependent, Kv; Potassium channel, voltage dependent, Kv9; SKP1/BTB/POZ domain superfamily; Voltage-dependent channel domain superfamily; Voltage-gated potassium channel. Its molecular function is described by: delayed rectifier potassium channel activity; voltage-gated potassium cha…
p_wald494760	chr3L:12543568	5.5274e-05	0.572507
p_wald855744	chrX:17216280	5.52799e-05	0.572507
p_wald776079	chrX:8832210	5.56289e-05	0.572507	none	not within 2kb of gene	-	-	-
p_wald49846	chr2L:8839877	5.7418e-05	0.572507
p_wald840865	chrX:15788558	5.76712e-05	0.572507
p_wald633313	chr3R:18728984	5.78419e-05	0.572507
p_wald253306	chr2R:17728939	5.81726e-05	0.572507	CG4984	promoter/intron	-	CG4984	unknown.
p_wald464832	chr3L:10817163	5.85774e-05	0.572507
p_wald728680	chrX:4066037	5.8932e-05	0.572507
p_wald594743	chr3R:12663771	5.9435e-05	0.572507
p_wald650325	chr3R:22025093	6.06155e-05	0.572507
p_wald510597	chr3L:13845621	6.20624e-05	0.572507
p_wald242775	chr2R:16962654	6.21548e-05	0.572507
p_wald546742	chr3L:18469889	6.26814e-05	0.572507
p_wald353185	chr3L:3792044	6.2789e-05	0.572507
p_wald570680	chr3R:6989679	6.2899e-05	0.572507
p_wald582946	chr3R:10167766	6.38083e-05	0.572507
p_wald582947	chr3R:10167769	6.38083e-05	0.572507
p_wald548285	chr3L:18801052	6.40145e-05	0.572507
p_wald520705	chr3L:14771749	6.53991e-05	0.579155	mop	CDS	myopic	CG9311	Protein features are: ALIX V-shaped domain; BRO1 domain; BRO1 domain superfamily; PTP type protein phosphatase; Protein-tyrosine phosphatase-like. Its molecular function is unknown. It is involved in the biological process described with 14 unique terms, many of which group under: positive regulation of cell communication; vesicle-mediated transport; positive regulation of cellular process; cell …
p_wald253323	chr2R:17730453	6.71406e-05	0.588106
p_wald261502	chr2R:18293497	6.7712e-05	0.588106
p_wald442370	chr3L:9496980	6.93661e-05	0.596734

## Sheet: Data S5 Mosaic Difference GWAS
Designation	Location	P Value	Adjusted P Value	Gene	Location in Gene	Full Name	CG	FlyBase Annotation
p_wald537707	chr3L:16980437	5.70288e-07	0.447178	Exn	intron	Ephexin	CG42665	Dbl homology (DH) domain; Dbl homology (DH) domain superfamily; PH-like domain superfamily; SH3 domain; SH3-like domain superfamily. Its molecular function is described by: Rho guanyl-nucleotide exchange factor activity. It is involved in the biological process described with: imaginal disc-derived leg morphogenesis; regulation of neurotransmitter secretion; melanotic encapsulation of foreign tar…
p_wald33723	chr2L:5855037	1.17126e-06	0.447178	TrissinR	intron	Trissin receptor	CG34381	G protein-coupled receptor, rhodopsin-like; GPCR, rhodopsin-like, 7TM. Its molecular function is described by: G-protein coupled peptide receptor activity; peptide binding; neuropeptide receptor activity. It is involved in the biological process described with: G-protein coupled receptor signaling pathway; cellular response to hormone stimulus; response to peptide.
p_wald223685	chr2R:15324753	1.8111e-06	0.447178	Arf51F	3'UTR	ADP ribosylation factor at 51F	CG8156	P-loop containing nucleoside triphosphate hydrolase; Small GTP-binding protein domain; Small GTPase superfamily, ARF type; Small GTPase superfamily, ARF/SAR type. Its molecular function is described by: NAD(P)+-protein-arginine ADP-ribosyltransferase activity; GTP binding; GTPase activity. It is involved in the biological process described with: male meiosis cytokinesis; compound eye morphogenesi…
p_wald671923	chr3R:25024411	2.29571e-06	0.447178	CG11781	CDS	-	CG11781	ER membrane protein complex subunit 6; Rab5-interacting protein family. Its molecular function is unknown. It is involved in the biological process described with: protein folding in endoplasmic reticulum; autophagosome assembly.
p_wald633628	chr3R:18784687	3.50426e-06	0.447178	CG7720	intron deep	-	CG7720	Sodium/glucose symporter superfamily; Sodium/solute symporter. Its molecular function is described by: transmembrane transporter activity. It is involved in the biological process described with: transmembrane transport.
p_wald671924	chr3R:25024416	3.7473e-06	0.447178	CG11781	CDS	-	CG11781	ER membrane protein complex subunit 6; Rab5-interacting protein family. Its molecular function is unknown. It is involved in the biological process described with: protein folding in endoplasmic reticulum; autophagosome assembly.
p_wald179737	chr2R:11756872	4.69616e-06	0.447178	ths	primer	thisbe	CG12443	Cytokine IL1/FGF; Fibroblast growth factor family. Its molecular function is described by: growth factor activity; fibroblast growth factor receptor binding. It is involved in the biological process described with: glial cell differentiation; larval somatic muscle development; glial cell development; larval visceral muscle development; fibroblast growth factor receptor signaling pathway; myoblast…
p_wald395386	chr3L:6461181	4.7742e-06	0.447178	CG42747	intron deep	-	CG42747	Mostly unknown.
p_wald395387	chr3L:6461197	4.83663e-06	0.447178	CG42747	intron deep	-	CG42747	Mostly unknown.
p_wald33847	chr2L:5875053	5.30383e-06	0.447178	rau	intron deep	rau	CG8965	Ras-associating (RA) domain; Ubiquitin-like domain superfamily. Its molecular function is described by: protein homodimerization activity; Ras GTPase binding. It is involved in the biological process described with: R7 cell development; glial cell development; positive regulation of fibroblast growth factor receptor signaling pathway; positive regulation of epidermal growth factor receptor signal…
p_wald223684	chr2R:15324742	5.63936e-06	0.447178	Arf51F	3'UTR	ADP ribosylation factor at 51F	CG8156	P-loop containing nucleoside triphosphate hydrolase; Small GTP-binding protein domain; Small GTPase superfamily, ARF type; Small GTPase superfamily, ARF/SAR type. Its molecular function is described by: NAD(P)+-protein-arginine ADP-ribosyltransferase activity; GTP binding; GTPase activity. It is involved in the biological process described with: male meiosis cytokinesis; compound eye morphogenesi…
p_wald395384	chr3L:6461161	5.94071e-06	0.447178	CG42747	intron deep	-	CG42747	Mostly unknown.
p_wald33848	chr2L:5875102	8.42655e-06	0.515618	rau	intron deep	rau	CG8965	Ras-associating (RA) domain; Ubiquitin-like domain superfamily. Its molecular function is described by: protein homodimerization activity; Ras GTPase binding. It is involved in the biological process described with: R7 cell development; glial cell development; positive regulation of fibroblast growth factor receptor signaling pathway; positive regulation of epidermal growth factor receptor signal…
p_wald827288	chrX:14501947	8.84352e-06	0.515618	none	not within 2kb of any gene	-	-	-
p_wald163266	chr2R:10172866	9.7336e-06	0.515618	KCNQ	intron deep	KCNQ potassium channel	CG33135	Ion transport domain; Potassium channel, voltage dependent, KCNQ; Potassium channel, voltage dependent, KCNQ, C-terminal; Voltage-gated potassium channel. Its molecular function is described by: voltage-gated cation channel activity; voltage-gated potassium channel activity. It is involved in the biological process described with: regulation of heart rate; cardiac muscle contraction; embryonic de…
p_wald400174	chr3L:6780390	1.02682e-05	0.515618	none	not within 2kb of any gene	-	-	-
p_wald400175	chr3L:6780398	1.02682e-05	0.515618	none	not within 2kb of any gene	-	-	-
p_wald33740	chr2L:5855954	1.02749e-05	0.515618	TrissinR	intron	Trissin receptor	CG34381	G protein-coupled receptor, rhodopsin-like; GPCR, rhodopsin-like, 7TM. Its molecular function is described by: G-protein coupled peptide receptor activity; peptide binding; neuropeptide receptor activity. It is involved in the biological process described with: G-protein coupled receptor signaling pathway; cellular response to hormone stimulus; response to peptide.
p_wald179740	chr2R:11757038	1.11422e-05	0.529714
p_wald54711	chr2L:9523130	1.3336e-05	0.602308
p_wald692213	chr3R:26758859	1.47059e-05	0.626109	none	not within 2kb of any gene	-	-	-
p_wald190816	chr2R:12649080	1.52493e-05	0.626109
p_wald592308	chr3R:11988336	1.82041e-05	0.63976
p_wald223689	chr2R:15324924	1.87635e-05	0.63976
p_wald478887	chr3L:11621314	1.93711e-05	0.63976
p_wald536490	chr3L:16817201	2.04513e-05	0.63976	nudC	intron	nudC	CG9710	CS domain; HSP20-like chaperone; NudC N-terminal domain; NudC family. Its molecular function is described by: unfolded protein binding. It is involved in the biological process described with: nucleus localization; nuclear migration; protein folding; positive regulation of dendrite morphogenesis.
p_wald467893	chr3L:10975665	2.08375e-05	0.63976	CG14147	close to	-	CG14147	Mostly unknown.
p_wald258611	chr2R:18055537	2.23454e-05	0.63976
p_wald33843	chr2L:5874722	2.55972e-05	0.63976	rau	intron deep	rau	CG8965	Ras-associating (RA) domain; Ubiquitin-like domain superfamily. Its molecular function is described by: protein homodimerization activity; Ras GTPase binding. It is involved in the biological process described with: R7 cell development; glial cell development; positive regulation of fibroblast growth factor receptor signaling pathway; positive regulation of epidermal growth factor receptor signal…
p_wald250207	chr2R:17485348	2.56213e-05	0.63976	CG43110	5'UTR	-	CG43110	Peptidase S1, PA clan; Peptidase S1A, chymotrypsin family; Serine proteases, trypsin domain; Serine proteases, trypsin family, serine active site. Its molecular function is described by: serine-type endopeptidase activity. It is involved in the biological process described with: proteolysis.
p_wald850030	chrX:16759565	2.57199e-05	0.63976
p_wald354555	chr3L:3864998	2.70041e-05	0.63976
p_wald301084	chr3L:979394	2.71506e-05	0.63976
p_wald478886	chr3L:11621306	2.85873e-05	0.63976
p_wald869602	chrX:18693294	2.86293e-05	0.63976	none	not within 2kb of any gene	-	-	-
p_wald33233	chr2L:5758252	2.91788e-05	0.63976
p_wald50772	chr2L:8997690	2.99118e-05	0.63976
p_wald397514	chr3L:6595779	3.07792e-05	0.63976
p_wald850348	chrX:16785000	3.20745e-05	0.63976
p_wald494251	chr3L:12509654	3.25102e-05	0.63976
p_wald359717	chr3L:4149992	3.29828e-05	0.63976
p_wald544945	chr3L:18219167	3.42444e-05	0.63976
p_wald45655	chr2L:8087687	3.43142e-05	0.63976
p_wald359718	chr3L:4150027	3.63832e-05	0.63976
p_wald265228	chr2R:18608063	3.88411e-05	0.63976
p_wald265227	chr2R:18608057	3.90298e-05	0.63976
p_wald777282	chrX:8938635	3.98778e-05	0.63976
p_wald193988	chr2R:12952192	4.01168e-05	0.63976	CG44250	5'UTR	-	CG44250	DM9 repeat; Domain of unknown function DUF3421.
p_wald457140	chr3L:10373267	4.08839e-05	0.63976
p_wald397516	chr3L:6595815	4.18313e-05	0.63976
p_wald703601	chrX:905044	4.23389e-05	0.63976
p_wald223687	chr2R:15324900	4.2714e-05	0.63976
p_wald718941	chrX:3060114	4.41129e-05	0.63976
p_wald692262	chr3R:26762744	4.4475e-05	0.63976
p_wald692266	chr3R:26762998	4.4475e-05	0.63976
p_wald692267	chr3R:26763000	4.4475e-05	0.63976
p_wald692269	chr3R:26763051	4.4475e-05	0.63976
p_wald692270	chr3R:26763053	4.4475e-05	0.63976
p_wald692271	chr3R:26763068	4.4475e-05	0.63976
p_wald692274	chr3R:26763090	4.4475e-05	0.63976
p_wald692275	chr3R:26763094	4.4475e-05	0.63976
p_wald667477	chr3R:24460692	4.51451e-05	0.63976
p_wald94202	chr2L:19247369	4.53306e-05	0.63976
p_wald223688	chr2R:15324916	4.60613e-05	0.63976
p_wald395380	chr3L:6461096	4.69289e-05	0.63976
p_wald648296	chr3R:21701881	4.78386e-05	0.63976
p_wald302830	chr3L:1071510	4.80595e-05	0.63976
p_wald592911	chr3R:12206308	4.90097e-05	0.63976
p_wald667475	chr3R:24460419	5.00268e-05	0.63976
p_wald530782	chr3L:16029020	5.06529e-05	0.63976
p_wald530784	chr3L:16029025	5.06529e-05	0.63976
p_wald692092	chr3R:26748286	5.09948e-05	0.63976

## Sheet: Data S6 shRNA Lines
Trip 36303	R♂	Ry♂	WT♂	y♂	R♀	Rm♀	Ry♀	WT♀	m♀	y♀			R♂	Ry♂	WT♂	y♂	R♀	Rm♀	Ry♀	WT♀	m♀	y♀	Total		Background	Gene Name	Drive Conversion	Germline r2	Male WT		Embryo r2 (in flies inheriting the drive)	Embryo r2 standard deviation	P-Value Wmbryo r2	Holm–Bonferroni P-Value Cutoff			Embryo Mosaic r2 (in flies inheriting the drive)	Embryo Mosaic r2 standard deviation	Mosaic Difference from Expected	P-Value Embryo Mosaic r2	Holm–Bonferroni P-Value Cutoff
	3	29	3	11	27	11	4	15	1	2		Control Lines (control group followed by TRiP or VDRC line designaiton)
	2	41	4	16	22	14	0	10	2			VDRC 60100	0	171	10	49	52	51	34	20	16	10	413		VDRC	Control VDRC	0.491525	0.426087	0.0869565		0.248175	0.0369043	N/A	N/A			0.372263	0.0413003	-0.107615	N/A	N/A
	0	35	2	14	30	10	9	11		3		P40 36304	2	199	0	85	53	62	82	35	38	19	575		P40	Control P40	0.384348	0.594406	0		0.416244	0.0351202	N/A	N/A			0.314721	0.0330875	-0.120326	N/A	N/A
	0	24		10	27	5	2	15				P2 36303	6	150	11	58	136	43	21	60	3	6	494		P2	Control P2	0.441296	0.515556	0.0977778		0.105	0.0216766	N/A	N/A			0.215	0.0290495	-0.262227	N/A	N/A
	1	21	2	7	30	3	6	9		1
Trip 36304	R♂	Ry♂	WT♂	y♂	R♀	Rm♀	Ry♀	WT♀	m♀	y♀		Embryo r2 rate testing
	0	47		15	10	19	20	6	10	3		VDRC 104478	6	275	22	73	70	140	117	66	41	29	839		VDRC	CG7220	0.449344	0.388298	0.117021		0.357798	0.0265082	0.0227	0.0125	test batch 1		0.428135	0.027363	-0.0283741	0.3013	0.00625	test batch 2
	1	45		16	18	11	8	6	4	3		P40 40849	7	185	5	74	76	80	56	29	21	6	539		P40	camta	0.499072	0.546125	0.0369004		0.264151	0.0302798	0.0012	0.00833333	test batch 1		0.377358	0.0332911	-0.100485	0.2124	0.005	test batch 2
	1	34		18	10	12	18	8	4	3		P40 67932	4	168	5	55	106	64	68	49	25	15	559		P40	Arp1	0.466905	0.474138	0.0431034		0.285714	0.0292829	0.006	0.01	test batch 1		0.268908	0.0287408	-0.205448	0.3393	0.00833333	test batch 2
	0	49		27	11	12	19	6	11	5		P40 52882	4	107	5	39	58	80	89	39	27	19	467		P40	CG5009	0.447537	0.503226	0.0645161		0.39207	0.0324038	1	0.05	test batch 1		0.352423	0.0317077	-0.0922599	0.4703	0.01	test batch 2
	0	24		9	4	8	17	9	9	5		P40 38263	1	146	0	5	24	64	73	8	29	13	363		P40	Dlish	0.526066	*female only drive conversion calculation and no germline r2 calculation	0		0.453416	0.0392341	0.5205	0.025	test batch 1		0.397516	0.0385689	-0.0206237	0.1195	0.00454545	test batch 2
Trip 40849	R♂	Ry♂	WT♂	y♂	R♀	Rm♀	Ry♀	WT♀	m♀	y♀		P40 51435	0	130	0	54	32	51	96	30	24	24	441		P40	CG6225	0.401361	0.586957	0		0.536313	0.0372731	0.0229	0.0166667	test batch 1		0.284916	0.0337373	-0.0863958	0.5739	0.0125	test batch 2
	0	42	2	12	12	28	18	2	9	1		P40 41875	1	210	1	4	24	102	187	9	60	41	639		P40	Pum	0.479905	*female only drive conversion calculation	0.00925926		0.597444	0.0277198	<0.0001	0.00714286	test batch 1		0.325879	0.0264926	-0.00283178	0.8458	0.025	test batch 2
	0	41	1	13	15	15	12	11	2	1
	4	33	1	21	18	10	12	7	2	3		Embryo mosaic r2 rate testing
	2	42	1	14	20	20	9	4	3			P2 51417	6	222	4	5	131	163	30	81	44	6	692		P2	Arf51F	0.424176	*female only drive conversion calculation	0.0337553		0.0925926	0.0161034	0.6514	0.05	test batch 2		0.503086	0.0277772	0.0278587	<0.0001	0.05	test batch 1
	1	27		14	11	7	5	5	5	1
Trip 51435	R♂	Ry♂	WT♂	y♂	R♀	Rm♀	Ry♀	WT♀	m♀	y♀		Additional siRNA Lines
	0	22		7	4	6	15	2	4	8		P40 51933	2	265	3	23	44	113	159	31	49	36	725		P40	Lig4	0.462963	*female only drive conversion calculation	0.0204778		0.503165	0.0281266	0.0569	0.00714286	test batch 2		0.357595	0.0269623	-0.0339535	0.3393	0.00714286	test batch 2
	0	32		12	6	12	21	11	7	6		P40 61942	1	246	2	73	70	106	76	53	42	19	688		P40	Irbp (Ku70)	0.450581	0.453416	0.0124224		0.301587	0.0289109	0.0129	0.01	test batch 2		0.420635	0.0310977	-0.0506081	0.0239	0.00416667	test batch 2
	0	29		7	7	5	21	4	8	6		P2 34578	5	149	2	44	143	49	30	74	9	3	508		P2	grn	0.480315	0.44	0.02		0.135135	0.0229447	0.3722	0.025	test batch 2		0.220721	0.027835	-0.260186	0.9065	0.05	test batch 2
	0	21		11	5	16	18	7	4	4		P2 34943	4	226	0	3	165	95	44	109	10	7	663		P2	CG42674	0.61086	*female only drive conversion calculation and no germline r2 calculation	0		0.144737	0.0201791	0.2223	0.0166667	test batch 2		0.3125	0.0265843	-0.169229	0.0188	0.00384615	test batch 2
	0	26		17	10	12	21	6	1			P40 40927	1	210	0	2	50	84	153	15	59	41	615		P40	vg	0.619512	*female only drive conversion calculation and no germline r2 calculation	0		0.533101	0.0294493	0.0125	0.00833333	test batch 2		0.292683	0.0268575	-0.080678	0.6155	0.0166667	test batch 2
Trip 52882	R♂	Ry♂	WT♂	y♂	R♀	Rm♀	Ry♀	WT♀	m♀	y♀		P40 62975	3	326	8	100	82	106	105	52	36	21	839		P40	CG4984	0.482718	0.457666	0.0366133		0.358362	0.0280138	0.2178	0.0125	test batch 2		0.361775	0.0280719	-0.0945568	0.2877	0.00555556	test batch 2
	0	25		8	15	20	19	3	8	6
	1	23	1	11	9	20	19	7	11	3																							bold denotes statistically significant values after Holm–Bonferroni multiple testing correction
	0	21	4	10	11	18	20	11	1	5																							test batch 1 represent GWAS hits (for the listed phenotype) and are tested together with Holm–Bonferroni multiple testing correction
	2	19		4	16	7	12	12	1	2																							test batch 2 represent targets with no GWAS hit (for the listed phenotype) and are tested together with Holm–Bonferroni multiple testing correction
	1	19		6	7	15	19	6	6	3
Trip 67932	R♂	Ry♂	WT♂	y♂	R♀	Rm♀	Ry♀	WT♀	m♀	y♀
	1	45	1	15	30	12	10	15	5	1
	0	34	2	10	19	16	14	5	6	2
	0	35		5	9	12	12	5	4	1
	1	26	1	15	21	13	15	11	6	6
	2	28	1	10	27	11	17	13	4	5
Trip 38263	R♂	Ry♂	WT♂	y♂	R♀	Rm♀	Ry♀	WT♀	m♀	y♀
	1	17	0	0	8	1	5	1	1	2
	0	12	0	0	4	1	2	2	0	0
	0	29	0	2	3	15	26	0	4	2
	0	31	0	3	5	26	19	0	10	4
	0	57	0	0	4	21	21	5	14	5
Trip 41875	R♂	Ry♂	WT♂	y♂	R♀	Rm♀	Ry♀	WT♀	m♀	y♀
	1	44	0	0	6	7	52	3	7	9
	0	39	0	1	1	20	19	0	16	8
	0	29	0	0	7	26	37	2	15	6
	0	52	0	1	8	15	34	3	14	7
	0	46	1	2	2	34	45	1	8	11
Trip 51417	R♂	Ry♂	WT♂	y♂	R♀	Rm♀	Ry♀	WT♀	m♀	y♀
	5	62	0	0	23	29	6	20	5	0
	1	37	0	1	29	13	6	13	4	2
	0	35	0	0	36	29	5	19	6	2
	0	34	3	4	19	37	8	16	16	2
	0	54	1	0	24	55	5	13	13	0
VDRC 60100	R♂	Ry♂	WT♂	y♂	R♀	Rm♀	Ry♀	WT♀	m♀	y♀
	0	35	4	16	17	8	6	6	2	1
	0	34	0	14	7	8	6	7	4	3
	0	27	3	7	14	4	4	2	3	2
	0	32	2	5	6	14	9	3	4	1
	0	43	1	7	8	17	9	2	3	3
VDRC 104478	R♂	Ry♂	WT♂	y♂	R♀	Rm♀	Ry♀	WT♀	m♀	y♀
	2	56	5	17	5	31	40	4	13	7
	3	54	4	10	18	26	14	12	8	6
	0	60	3	12	8	30	24	12	4	5
	1	56	7	23	20	29	16	14	15	5
	0	49	3	11	19	24	23	24	1	6
Additional siRNA Lines
Trip 51933	R♂	Ry♂	WT♂	y♂	R♀	Rm♀	Ry♀	WT♀	m♀	y♀
	2	66	0	7	13	19	25	8	9	7
	0	45	1	5	15	22	22	11	10	5
	0	47	1	3	2	34	28	4	10	4
	0	52	1	4	13	14	30	6	7	9
	0	55	0	4	1	24	54	2	13	11
Trip 61942	R♂	Ry♂	WT♂	y♂	R♀	Rm♀	Ry♀	WT♀	m♀	y♀
	1	43	0	13	14	11	21	17	3	5
	0	26	0	11	11	18	6	11	1	2
	0	59	1	15	10	26	27	4	18	2
	0	69	0	17	20	18	13	15	5	4
	0	49	1	17	15	33	9	6	15	6
Trip 34578	R♂	Ry♂	WT♂	y♂	R♀	Rm♀	Ry♀	WT♀	m♀	y♀
	1	47	1	16	20	15	8	14	3	2
	1	35	0	15	27	11	9	24	4
	0	31		4	24	10	7	10
	2	18		1	32	4	4	4	2	1
	1	18	1	8	40	9	2	22
Trip 34943	R♂	Ry♂	WT♂	y♂	R♀	Rm♀	Ry♀	WT♀	m♀	y♀
	3	42	0	1	45	11	8	24	1	2
	0	46	0	0	22	16	15	25	3	0
	1	56	0	1	38	22	6	20	5	0
	0	35	0	1	30	27	12	20	0	3
	0	47	0	0	30	19	3	20	1	2
Trip 40927	R♂	Ry♂	WT♂	y♂	R♀	Rm♀	Ry♀	WT♀	m♀	y♀
	0	24	0	1	1	8	17	1	8	5
	1	31	0	0	1	16	21	2	13	8
	0	36	0	1	14	27	40	9	8	7
	0	56	0	0	21	18	38	2	17	10
	0	63	0	0	13	15	37	1	13	11
Trip 62975	R♂	Ry♂	WT♂	y♂	R♀	Rm♀	Ry♀	WT♀	m♀	y♀
	0	51	4	10	24	11	18	11	3	4
	0	75	2	19	7	35	20	7	9	3
	3	46	0	31	9	21	19	11	15	5
	0	87	2	15	13	21	27	7	5	6
	0	67	0	25	29	18	21	16	4	3
